# Supplementary material for: Effect of Wearing a Novel Electronic Wearable Device on Hand Hygiene Compliance Among Health Care Workers: A Stepped-Wedge Cluster Randomized Clinical Trial
Source: PubMed Central journal article supplement (PMC7871189; doi:10.1001/jamanetworkopen.2020.35331), 2021-02-08
Supplement: jamanetwopen-e2035331-s001.pdf [file jamanetwopen-e2035331-s001.pdf]

2

3

4

5

# Impact of using a device providing individual feedback on healthcare workers hand hygiene

## behaviour: a stepped wedge cluster-randomized clinical trial

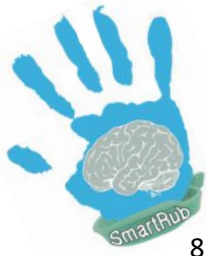

8

SmartRub®

9

10

11

12 Clinical Study Protocol

13 A stepped wedge cluster-randomized clinical trial assessing the impact of SMART-RUB® on hand  
14 hygiene compliance

15

|                            |                                                                                                                          |
|----------------------------|--------------------------------------------------------------------------------------------------------------------------|
| Study Type:                | Clinical trial<br>Improvement of clinical care quality                                                                   |
| Study Categorisation:      | Risk category A                                                                                                          |
| Study Registration:        | ISRCTN25430066 , 22/05/2017 <a href="http://www.isrctn.com/ISRCTN25430066">http://www.isrctn.com/ISRCTN25430066</a>      |
| Study Identifier:          | None                                                                                                                     |
| Principal Investigator:    | Didier Pittet                                                                                                            |
| Investigational Product:   | Device that measures the quantity of alcohol-based handrub and the duration of hand friction in each hand hygiene action |
| Protocol Version and Date: | Version 2.3, 02/05/2017                                                                                                  |

16

17

18

19

20

21 Signature Page

A stepped wedge cluster-randomized clinical trial: impact of SmartRub on hand hygiene compliance  
Version 2.3 of 02/05/2017

1

22  
23  
24  
25  
26  
27  
28  
29  
30  
31  
32  
33  
34  
35  
36  
37  
38  
39  
40  
41  
42  
43  
44  
45  
46  
47  
48  
49

Study Title                      Impact of using a device providing individual feedback on healthcare workers  
hand hygiene behaviour: a stepped wedge cluster-randomized clinical trial

The Sponsor-Investigator and trial statistician have approved the protocol version [\[2.3 \(dated 02.05.2017\)\]](#), and confirm hereby to conduct the study according to the protocol, current version of the World Medical Association Declaration of Helsinki, ICH-GCP guidelines or ISO 14155 norm if applicable and the local legally applicable requirements.

Sponsor-Investigator: Didier Pittet

---

Place/Date

---

Signature

50 **Table of Contents**

51

52 **1. ABBREVIATIONS ..... 4**

53 **2. SYNOPSIS ..... 5**

54 **3. LAY SUMMARY ..... 10**

55 **4. BACKGROUND ..... 11**

56 **5. STUDY RATIONALE..... 15**

57 **6. AIMS AND HYPOTHESIS ..... 15**

58 **7. STUDY DESIGN ..... 16**

59 **8. SAMPLE SIZE ..... 18**

60 **9. DATA ANALYSIS..... 19**

61 **10. RANDOMIZATION AND BLINDING..... 19**

62 **11. SETTING..... 20**

63 **12. STUDY ACTIVITIES..... 21**

64 **13. DATA COLLECTION ..... 28**

65 **14. PRIMARY AND SECONDARY ENDPOINTS ..... 33**

66 **15. STUDY POPULATION & ELIGIBILITY CRITERIA..... 35**

67 **16. INTERVENTION: THE ELECTRONIC DEVICE ..... 35**

68 **17. SAFETY ..... 37**

69 **18. WITHDRAWAL PROCESS ..... 37**

70 **19. DATA MANAGEMENT ..... 37**

71 **20. MONITORING ..... 38**

72 **21. CRITERIA FOR ENDING OF TRIAL / DEFINITION OF END OF TRIAL..... 38**

73 **22. ETHICAL CONSIDERATIONS..... 38**

74 **23. TIMEFRAME..... 38**

75 **24. LIMITATIONS ..... 38**

76 **25. IMPORTANCE AND IMPACT ..... 39**

77 **26. REFERENCES ..... 40**

78 **27. APPENDICE 1..... 47**

79

80

81 **1. Abbreviations**

82

83 ABHR: alcohol-based hand rubs

84 CDC: Centers for Disease Control and Prevention

85 CRF: case report form

86 ECDC: European Centre for Disease Prevention and Control

87 HAI: healthcare-associated infections

88 HCW: healthcare workers

89 HH: hand hygiene

90 HN: head nurse

91 HUG: University Hospitals of Geneva

92 WHO: World Health Organization

93

94

95

96

97

98

99

100

101

102

103

104

105

106

107

108

109

110

111

112

113

114

115

116

117

118

119

120

121

## 2. Synopsis

|                                      |                                                                                                                                                                                                                                                                                                                                                                                                                                                                                                                                                                                                                                                                                                                                                                                                                                                                                                                                                                                                                                                                                                                                                                                                                                                                                                                                                                                                                                                                                                                                                                                                                                                                                                                                                                                                                                                                                                                                                                                                                                                      |
|--------------------------------------|------------------------------------------------------------------------------------------------------------------------------------------------------------------------------------------------------------------------------------------------------------------------------------------------------------------------------------------------------------------------------------------------------------------------------------------------------------------------------------------------------------------------------------------------------------------------------------------------------------------------------------------------------------------------------------------------------------------------------------------------------------------------------------------------------------------------------------------------------------------------------------------------------------------------------------------------------------------------------------------------------------------------------------------------------------------------------------------------------------------------------------------------------------------------------------------------------------------------------------------------------------------------------------------------------------------------------------------------------------------------------------------------------------------------------------------------------------------------------------------------------------------------------------------------------------------------------------------------------------------------------------------------------------------------------------------------------------------------------------------------------------------------------------------------------------------------------------------------------------------------------------------------------------------------------------------------------------------------------------------------------------------------------------------------------|
| <b>Sponsor/Sponsor-Investigator</b>  | Didier Pittet                                                                                                                                                                                                                                                                                                                                                                                                                                                                                                                                                                                                                                                                                                                                                                                                                                                                                                                                                                                                                                                                                                                                                                                                                                                                                                                                                                                                                                                                                                                                                                                                                                                                                                                                                                                                                                                                                                                                                                                                                                        |
| <b>Study Title:</b>                  | Impact of using a device providing individual feedback on healthcare workers hand hygiene behaviour: a stepped wedge cluster-randomized clinical trial                                                                                                                                                                                                                                                                                                                                                                                                                                                                                                                                                                                                                                                                                                                                                                                                                                                                                                                                                                                                                                                                                                                                                                                                                                                                                                                                                                                                                                                                                                                                                                                                                                                                                                                                                                                                                                                                                               |
| <b>Short Title/Study ID:</b>         | SmartRub®                                                                                                                                                                                                                                                                                                                                                                                                                                                                                                                                                                                                                                                                                                                                                                                                                                                                                                                                                                                                                                                                                                                                                                                                                                                                                                                                                                                                                                                                                                                                                                                                                                                                                                                                                                                                                                                                                                                                                                                                                                            |
| <b>Protocol Version and Date:</b>    | Version 2.3 of the 02.05.2017                                                                                                                                                                                                                                                                                                                                                                                                                                                                                                                                                                                                                                                                                                                                                                                                                                                                                                                                                                                                                                                                                                                                                                                                                                                                                                                                                                                                                                                                                                                                                                                                                                                                                                                                                                                                                                                                                                                                                                                                                        |
| <b>Trial Registration:</b>           | Trial registered in ISRCTN25430066, 22/05/2017<br><a href="http://www.isrctn.com/ISRCTN25430066">http://www.isrctn.com/ISRCTN25430066</a>                                                                                                                                                                                                                                                                                                                                                                                                                                                                                                                                                                                                                                                                                                                                                                                                                                                                                                                                                                                                                                                                                                                                                                                                                                                                                                                                                                                                                                                                                                                                                                                                                                                                                                                                                                                                                                                                                                            |
| <b>Study Category with Rationale</b> | Risk category A<br>This is a clinical trial of quality improvement of healthcare. Its objective is to improve compliance of healthcare workers with hand hygiene.                                                                                                                                                                                                                                                                                                                                                                                                                                                                                                                                                                                                                                                                                                                                                                                                                                                                                                                                                                                                                                                                                                                                                                                                                                                                                                                                                                                                                                                                                                                                                                                                                                                                                                                                                                                                                                                                                    |
| <b>Phase of development</b>          | Not applicable.                                                                                                                                                                                                                                                                                                                                                                                                                                                                                                                                                                                                                                                                                                                                                                                                                                                                                                                                                                                                                                                                                                                                                                                                                                                                                                                                                                                                                                                                                                                                                                                                                                                                                                                                                                                                                                                                                                                                                                                                                                      |
| <b>Background and Rationale:</b>     | <p>Healthcare-associated infections (HAI) are a major public health problem, with an estimated hundreds of millions of new episodes occurring annually worldwide. They affect approximately 7% and 10% of all hospitalized patients in developed and developing countries, respectively, and are responsible for millions of deaths worldwide each year.</p> <p>It is well recognized that as much as 50-70% of the HAI infections episodes are transmitted or inoculated by healthcare workers (HCWs) hands due to the lack of proper hand hygiene (HH), which remains the most efficient method to prevent its occurrence. For this reason, the World Health Organization (WHO) recommends a Multimodal Strategy with 5 elements to improve HH practices in the healthcare setting. In that list, recommendation number 3 (performing observation of HH practices and providing timely performance feedback) is one of the most challenging because evaluating HH practices by direct observation is a time-consuming and costly task.</p> <p>An electronic device intended to continuously monitor HH practices and to provide a real-time feedback to healthcare workers could be very useful. The device intended to be studied in this study consists in a bracelet and a clip added to the individual bottle of ABHR that measures and provides feedback to the HCW on the volume of ABHR and duration of hand friction of each individual hand hygiene action performed. The volume of ABHR and duration of hand friction are considered surrogate markers of hand hygiene gesture quality. This device has potential advantages over traditional strategies to promote HH: it is not expensive and it is simple to implement; it may provide a continuous sense of “being observed” to HCWs and could influence their behaviour regarding HH, potentially improving compliance when they are not observed; it may also influence the quality of HH action. Besides, hand hygiene quality is important and it is rarely assessed in hand</p> |

|                                                                  |                                                                                                                                                                                                                                                                                                                                                                                                                                                                                                                                                                                                                                                                                                                                                                                                                                                                                                                                                                                                                                                                                                                                                                                                                                                                                                                                                                                                                                                                                                                                                                                                                                                                                                                                                                                                                                                                                                                                                                                                                                                                                                                                                                                                                                                                                                                                                             |
|------------------------------------------------------------------|-------------------------------------------------------------------------------------------------------------------------------------------------------------------------------------------------------------------------------------------------------------------------------------------------------------------------------------------------------------------------------------------------------------------------------------------------------------------------------------------------------------------------------------------------------------------------------------------------------------------------------------------------------------------------------------------------------------------------------------------------------------------------------------------------------------------------------------------------------------------------------------------------------------------------------------------------------------------------------------------------------------------------------------------------------------------------------------------------------------------------------------------------------------------------------------------------------------------------------------------------------------------------------------------------------------------------------------------------------------------------------------------------------------------------------------------------------------------------------------------------------------------------------------------------------------------------------------------------------------------------------------------------------------------------------------------------------------------------------------------------------------------------------------------------------------------------------------------------------------------------------------------------------------------------------------------------------------------------------------------------------------------------------------------------------------------------------------------------------------------------------------------------------------------------------------------------------------------------------------------------------------------------------------------------------------------------------------------------------------|
|                                                                  | <p>hygiene monitoring. We have performed a series of experimental-based studies to address the hand hygiene action quality and we have established an optimized volume of ABHR, according to the hand size of the HCW, and duration of hand friction of 15 seconds. These parameters will be applied in the current study.</p>                                                                                                                                                                                                                                                                                                                                                                                                                                                                                                                                                                                                                                                                                                                                                                                                                                                                                                                                                                                                                                                                                                                                                                                                                                                                                                                                                                                                                                                                                                                                                                                                                                                                                                                                                                                                                                                                                                                                                                                                                              |
| <p><b>Objective(s):</b></p>                                      | <p>We aim to identify the effectiveness of using a new device providing automatic, immediate and personal feedback regarding the volume of ABHR and duration of hand friction during each hand hygiene gesture in promoting HH compliance amongst HCWs performing patient-care activities, as well as in enhancing the quality of the HH action.</p> <p>We hypothesize that compliance with HH amongst HCWs may be improved by at least a relative 20%, from baseline to intervention, if they receive a continuous feedback about the quality of their hand hygiene gesture during daily patient care when using the hand hygiene device.</p>                                                                                                                                                                                                                                                                                                                                                                                                                                                                                                                                                                                                                                                                                                                                                                                                                                                                                                                                                                                                                                                                                                                                                                                                                                                                                                                                                                                                                                                                                                                                                                                                                                                                                                              |
| <p><b>Outcome:<br/>Primary Outcome<br/>Secondary Outcome</b></p> | <p>Primary outcome:<br/>Hand hygiene compliance is measured by direct observation by well-trained IPC professionals according to the WHO methodology at the individual HCW level at six time-points (once a month) in the three study periods (baseline, transition period and intervention).</p> <p>Secondary outcomes:</p> <ol style="list-style-type: none"> <li>1. Hand hygiene quality is assessed using volume of ABHR poured by HCWs and duration of handrubbing in each HH action using the device collecting automatic and continuous data</li> <li>2. Frequency of hand hygiene is measured using the device collecting automatic and continuous data</li> <li>3. Adherence to hand hygiene device is measured using how many hours the device is used by HCWS using the device collecting automatic and continuous data</li> <li>4. Hand hygiene compliance at follow-up is measured by direct observation by well-trained IPC professionals to assess for the sustainability of the intervention at three month follow up</li> <li>5. Hand hygiene compliance and alcohol-based handrub consumption at a unit level is measured using the HH compliance data is recorded on a regular basis by the IPC professionals and ABHR consumption is provided monthly by the pharmacy</li> <li>6. Satisfaction and perception of usefulness of the device by HCWs is measured using a questionnaire distributed to participants and some focus group discussions with HCWs participating in the study to evaluate their experience with the device use at the end of the intervention</li> <li>7. Hand hygiene quality and HH compliance among HCWs working in several units during the study period. This is done as a sub-study with HCWs that are willing to participate but that are excluded from the main study due to working in several units (meaning that they can't be allocated to a cluster). This group of HCWs receives the device only in the fifth month of the study, when all the units have already started the study intervention, to avoid contamination. These HCWs data does not contribute to the primary outcome analysis.</li> <li>8. Adverse events related to the device are measured using a list of open responses (ie., skin irritation, injury to patient, etc) asked to participants after each HH session</li> </ol> |

|                                      |                                                                                                                                                                                                                                                                                                                                                                                                                                                                                                                                                                                                                                                                                                                                                                                                                                                                                                                                                                                                                                                                                                                                                                                                                                                                                                           |
|--------------------------------------|-----------------------------------------------------------------------------------------------------------------------------------------------------------------------------------------------------------------------------------------------------------------------------------------------------------------------------------------------------------------------------------------------------------------------------------------------------------------------------------------------------------------------------------------------------------------------------------------------------------------------------------------------------------------------------------------------------------------------------------------------------------------------------------------------------------------------------------------------------------------------------------------------------------------------------------------------------------------------------------------------------------------------------------------------------------------------------------------------------------------------------------------------------------------------------------------------------------------------------------------------------------------------------------------------------------|
|                                      | 9. Bloodstream infections (BSI) surveillance are measured using the data routinely and prospectively collected by the IPC program in order to analyse if there is a change in incidence of BSI in the units during the study period                                                                                                                                                                                                                                                                                                                                                                                                                                                                                                                                                                                                                                                                                                                                                                                                                                                                                                                                                                                                                                                                       |
| <b>Study Design:</b>                 | Stepped wedge, cluster-randomized, controlled, open-label clinical trial. The hospital ward is the unit of randomization. Primary outcome will be assessed at the HCW level (closed cohort).                                                                                                                                                                                                                                                                                                                                                                                                                                                                                                                                                                                                                                                                                                                                                                                                                                                                                                                                                                                                                                                                                                              |
| <b>Inclusion/Exclusion Criteria:</b> | <p>Study population: healthcare workers working at the University Hospitals of Geneva (HUG) with patient care activities.</p> <p>All <b>units</b> will be screened to participate in the study.</p> <p>Inclusion criteria: All units are eligible to participate in the study.</p> <p>Exclusion criteria: Units without patient-care activities.</p> <p>All <b>HCWs</b> in eligible wards can participate in the study.</p> <p>Inclusion criteria: All HCWs working in patient-care activities.</p> <p>Exclusion criteria:</p> <ol style="list-style-type: none"> <li>1. Work or will work in several different units during the six months after study start</li> <li>2. Who will leave the unit in the six months after study start</li> <li>3. Who have more than three consecutive weeks of vacations in the six months after the study start</li> <li>4. Who don't use the standard ABHR at HUG</li> </ol>                                                                                                                                                                                                                                                                                                                                                                                           |
| <b>Measurements and Procedures:</b>  | <p>This will be a stepped-wedged, cluster randomized, controlled, open-label, clinical trial in the University Hospitals of Geneva (HUG). The intervention will consist of wearing an electronic device intended to provide immediate, individualized feedback to HCWs at the point of each HH action. Feedback is provided regarding the quality of his/her action in terms of duration and volume of ABHR used, both parameters reflecting the quality of HH. In addition, the device will also record information regarding the date, hour, volume of ABHR, and duration of each HH action performed by the HCW using it.</p> <p>A pragmatic stepped wedge design where clusters (wards) will be rolled out randomly and sequentially from no intervention (baseline), to inactive device (transition period) and finally to active device (intervention) followed by a period of (at distance) follow-up was designed.</p> <p>Statistical analyses will take into account some clustering in the data at the ward level and generalized linear mixed models with a random effect on the intercept at ward level will be performed. Random block randomization of wards will be done. Hand hygiene observers will be blinded regarding allocation of wards until the device delivery to the wards.</p> |

|                                            |                                                                                                                                                                                                                                                                                                                                                                                                                                                                                                                                                                                                                                                                                                                                                                                                                                                                                                                                                                                                                                                                                                                                                                                                                                                                                                                                                                                                                                                                                                                                                                                                                                                                                                                                                                                                                                                                                                                                                                                                                                                                                                                                                                                                                                          |
|--------------------------------------------|------------------------------------------------------------------------------------------------------------------------------------------------------------------------------------------------------------------------------------------------------------------------------------------------------------------------------------------------------------------------------------------------------------------------------------------------------------------------------------------------------------------------------------------------------------------------------------------------------------------------------------------------------------------------------------------------------------------------------------------------------------------------------------------------------------------------------------------------------------------------------------------------------------------------------------------------------------------------------------------------------------------------------------------------------------------------------------------------------------------------------------------------------------------------------------------------------------------------------------------------------------------------------------------------------------------------------------------------------------------------------------------------------------------------------------------------------------------------------------------------------------------------------------------------------------------------------------------------------------------------------------------------------------------------------------------------------------------------------------------------------------------------------------------------------------------------------------------------------------------------------------------------------------------------------------------------------------------------------------------------------------------------------------------------------------------------------------------------------------------------------------------------------------------------------------------------------------------------------------------|
| <b>Study Intervention and comparators:</b> | <p>Participants are given an electronic device in the form of a wrist band, and a pocket-size individual bottle of alcohol based hand rubs (ABHR) with a “clip” inside that provides a personal, automatic and individualised feedback on hand hygiene quality surrogate markers to HCWs. This device was developed at the University of Geneva Hospitals and Faculty of Medicine in cooperation with the School of Engineers of Geneva. In the designed stepped wedge study, the clusters (units) are randomly and sequentially rolled out from baseline, to a fixed transition period of one month and followed by the intervention period. The length of the time-points is one month and the study has 4 steps.</p> <p>Random block randomisation of units is done. Hand hygiene observers and participants are blinded regarding allocation of units until the device delivery.</p> <p>Step 1: This step consists of a baseline period of one month, a transition period of one month and the intervention period of four months.</p> <p>Step 2: This step consists of a baseline period of two months, a transition period of one month and the intervention period of three months.</p> <p>Step 3: This step consists of a baseline period of three months, a transition period of one month and the intervention period of two months.</p> <p>Step 4: This step consists of a baseline period of four months, a transition period of one month and the intervention period of one month.</p> <p>The baseline period there is no intervention, as it corresponds to standard of practices (therefore no device is in use). In the transition period HCWs use the device, but they do not receive any feedback about their correct practices. In the intervention period HCWs use the device that provides them with feedback about how well they are doing with their hygiene compliance.</p> <p>Throughout all the study periods HCWs perform their daily activities and are observed regarding their compliance with hand hygiene. This study will be conducted at the Geriatric Hospital, one of the 8 sites of HUG. In 2018, we aim to perform a larger study to test the device in the acute care hospital sites of HUG.</p> |
| <b>Number of Participants:</b>             | In total, 60 participants (5 HCW per ward, 12 wards) would be needed to answer the research question according to the sample size calculation.                                                                                                                                                                                                                                                                                                                                                                                                                                                                                                                                                                                                                                                                                                                                                                                                                                                                                                                                                                                                                                                                                                                                                                                                                                                                                                                                                                                                                                                                                                                                                                                                                                                                                                                                                                                                                                                                                                                                                                                                                                                                                           |
| <b>Study Duration:</b>                     | The protocol will be implemented from May 2017 until February 2018. The data entry will be performed at the same time. We will perform the data cleaning and analyze the data from February 2018 to April 2018. After that we will present the results on national and international conferences, as well as write a manuscript for submission.                                                                                                                                                                                                                                                                                                                                                                                                                                                                                                                                                                                                                                                                                                                                                                                                                                                                                                                                                                                                                                                                                                                                                                                                                                                                                                                                                                                                                                                                                                                                                                                                                                                                                                                                                                                                                                                                                          |
| <b>Study Schedule:</b>                     | From May 2017.                                                                                                                                                                                                                                                                                                                                                                                                                                                                                                                                                                                                                                                                                                                                                                                                                                                                                                                                                                                                                                                                                                                                                                                                                                                                                                                                                                                                                                                                                                                                                                                                                                                                                                                                                                                                                                                                                                                                                                                                                                                                                                                                                                                                                           |
| <b>Investigator(s):</b>                    | <p>Didier Pittet<br/> Yves Martin<br/> Daniela Pires<br/> Angèle Gayet-Ageron<br/> Walter Zingg<br/> Carolina Fankhauser<br/> Ermira Tartari<br/> Josiane Sztajzel-Boissard</p>                                                                                                                                                                                                                                                                                                                                                                                                                                                                                                                                                                                                                                                                                                                                                                                                                                                                                                                                                                                                                                                                                                                                                                                                                                                                                                                                                                                                                                                                                                                                                                                                                                                                                                                                                                                                                                                                                                                                                                                                                                                          |



|                                                  |                                                                                                                                                                                                                                                                                                                                                                                                                                                                                                                                                                                                                                                                                                                                                                                                                                                                                                                                                                                                                                                                                                                                                                                                                                                                                       |
|--------------------------------------------------|---------------------------------------------------------------------------------------------------------------------------------------------------------------------------------------------------------------------------------------------------------------------------------------------------------------------------------------------------------------------------------------------------------------------------------------------------------------------------------------------------------------------------------------------------------------------------------------------------------------------------------------------------------------------------------------------------------------------------------------------------------------------------------------------------------------------------------------------------------------------------------------------------------------------------------------------------------------------------------------------------------------------------------------------------------------------------------------------------------------------------------------------------------------------------------------------------------------------------------------------------------------------------------------|
|                                                  | Fernando Bellissimo-Rodrigues<br>University Hospitals of Geneva, Infection Prevention and Control Programme, Rue Gabrielle-Perret-Gentil 4, CH-1211 Genève 14                                                                                                                                                                                                                                                                                                                                                                                                                                                                                                                                                                                                                                                                                                                                                                                                                                                                                                                                                                                                                                                                                                                         |
| <b>Study Centre(s):</b>                          | Single-centre.                                                                                                                                                                                                                                                                                                                                                                                                                                                                                                                                                                                                                                                                                                                                                                                                                                                                                                                                                                                                                                                                                                                                                                                                                                                                        |
| <b>Statistical Analysis incl. Power Analysis</b> | <p>We hypothesized that using the active device will increase the mean compliance with HH by a 20% relative increase from 69% to 83%, corresponding to a standardized difference in proportions of 0.35. Due to the clustered study design, we will apply a correction for the correlation of compliance within the same wards by calculating a design effect. We anticipate recruiting a maximum of 5 HCWs per ward, and will use an intra-class correlation (ICC) coefficient of 0.015 (based on data from the 2013-2014 survey about HH compliance in our institution), leading to a design effect of 1.06. Considering a study power of 80%, and an alpha error fixed at 5%, we would need 12 wards with 5 HCWs included in each one to test our study hypothesis.</p> <p>During a session of 20 minutes of observation by a HCW, we expect to an average of 5 HH opportunities. As each HCW will be observed for 6 sessions, the average number of opportunities per HCW will be 30. For the same HCW, we specifically monitor their compliance with each of the 5 moments for HH. Considering 12 wards to be included, 5 HCWs to be observed within each unit, for 6 sessions of observations for each HCW, the total number of observation sessions will be therefore 360.</p> |
| <b>GCP Statement:</b>                            | This study will be conducted in compliance with the protocol, the current version of the Declaration of Helsinki, the ICH-GCP or ISO EN 14155 (as far as applicable) as well as all national legal and regulatory requirements.                                                                                                                                                                                                                                                                                                                                                                                                                                                                                                                                                                                                                                                                                                                                                                                                                                                                                                                                                                                                                                                       |

123  
124  
125  
126  
127  
128  
129  
130  
131  
132  
133  
134  
135  
136  
137  
138  
139  
140

141 **3. Lay summary**

142 Healthcare-associated infections (HAI) are a major public health problem. They are estimated to represent  
143 hundreds of millions of new episodes each year leading to significant mortality and financial losses for  
144 health systems. HAI affect approximately 7% and 10% of all hospitalized patients in developed and  
145 developing countries respectively, and are responsible for millions of deaths worldwide each year. In  
146 parallel, studies have shown that as much as 50-70% of all HAI are transmitted through the hands of  
147 healthcare workers (HCWs) due to a lack of proper hand hygiene (HH). As a consequence, HH remains  
148 the most efficient method to prevent the occurrence of such infections.

149 HH seems to be a very simple action but it is insufficiently performed by HCWs in hospitals. The  
150 objective of the current study is to improve both the compliance with hand hygiene and the quality of HH  
151 action. We would like to assess the role of an electronic device intended to continuously monitor each HH  
152 action (volume of ABHR used and duration of hand friction performed by HCWs) and provide real-time  
153 feedback. We will conduct a randomized clinical trial with a very robust methodology and a pragmatic  
154 approach in several wards at the University Hospitals of Geneva, a large tertiary-care university hospital  
155 with long-term successful experience in HH promotion.

156 Considering that HAI is a major public health problem, we are confident that the device to be  
157 tested in our study will contribute to prevent the occurrence of infections and promote institutional safety  
158 culture in the future.

159  
160  
161  
162  
163  
164

## 165 **4. Background**

### 166 **Burden of healthcare-associated infections**

167 Healthcare-associated infections (HAI) are a major threat to patients in the healthcare setting. They affect  
168 approximately 7 and 10% of all hospitalized patients in developed and developing countries, respectively,  
169 and are responsible for millions of deaths worldwide each year.<sup>1,2</sup> In Europe, the European Centre for  
170 Disease Prevention and Control (ECDC) estimated that during 2011-2012 the prevalence of HAI was  
171 5.7%, which is equivalent to 81,089 patients affected a day.<sup>2</sup> The ECDC also estimated that, in acute-care  
172 hospitals alone, 3.2 million patients are affected by HAI each year, directly causing 37,000 deaths, and  
173 contributing to 110,000 additional deaths, extra-costs reaching approximately € 7 billion.<sup>2,3</sup> In  
174 Switzerland, they cause at least 2,000 deaths corresponding to an annual extra cost of 350 million CHF per  
175 year.<sup>4</sup>

### 176 **Importance of hand hygiene to prevent HAI**

177 It is now well recognized that as much as 50-70% of the HAIs are transmitted or inoculated by healthcare  
178 workers (HCWs) hands due to the lack of proper and timely hand hygiene (HH).<sup>5-10</sup> HH may be performed  
179 by two different methods, handwashing with soap and water or handrubbing with an alcohol-based  
180 handrub (ABHR), the latter being preferred in most clinical situations due to its greater microbiological  
181 efficacy, better skin tolerance and more practical application.<sup>6,7,11</sup> In our institution, the University  
182 Hospitals of Geneva (HUG), more than 98% of all HH actions are performed using ABHR.

183 For the last 10 years, The World Health Organization (WHO) has been extensively promoting HH in the  
184 healthcare setting to enhance patient safety.<sup>12,13,14</sup> According to the WHO multimodal strategy for HH  
185 improvement,<sup>13</sup> five elements are considered essential requirements for achieving best practices, one of  
186 which is the monitoring of hand hygiene practices and feedback.

### 187 **Hand hygiene monitoring**

188 The easiest and less costly way to broadly estimate HH compliance is to regularly measure ABHR and  
189 soap consumption.<sup>12</sup> Nonetheless, this measurement will only provide a general assessment of the  
190 situation, with no further details on individual compliance for specific indications. Although better than  
191 not monitoring anything, this should be used as a single strategy only in low-resource settings, or in low-  
192 risk facilities, such as those providing ambulatory care.<sup>15,16</sup> Several more specific approaches have been  
193 proposed for HH compliance monitoring. Developed 20 years ago at the HUG, the peer-based direct  
194 observation method is still considered the gold standard by WHO.<sup>12,14</sup> This method is able to identify all  
195 five main indications for performing HH, which are clinically relevant for both the patient's and the  
196 HCW's health,<sup>17</sup> and has been validated and used in a wide range of facilities in different countries,

197 continents and cultures, shown to be universally efficient.<sup>18-23</sup> Beyond that, it provides both an opportunity  
198 for the infection control practitioners to identify local obstacles for HH, and to give immediate customized  
199 feedback to the HCW.<sup>24-25</sup> However, the drawback of this gold standard method is that it is time-  
200 consuming. Since it does not provide a sustained effect after being implemented, HH observation and  
201 correspondent feedback must be continuously promoted, to assure maintenance of high HH  
202 compliance.<sup>14,24,25</sup> Another limitation of this method is that it doesn't monitor the quality of the HH action.

203 More recently, automated electronic monitoring of HH practices have been proposed as an  
204 alternative to the direct observation, given that they are likely to consume fewer human resources and  
205 provide larger and more representative data sets, and be less subject to observation bias and Hawthorne  
206 effect.<sup>26-43</sup> It is now considered a promising tool, opening the possibility of continuously monitoring HH  
207 practices and providing feedback to HCWs, eventually enhancing HH practices.<sup>42,43</sup> The major limitations  
208 of automated methods are their high costs, and their inability to monitor compliance with HH.<sup>42,43</sup>

209 One of these novel technologies is video-monitoring direct observation, which has been the focus  
210 of some previous studies.<sup>38-41</sup> Its main advantage is that it collects a large amount of data, since it  
211 continuously records HH actions and opportunities. However, there is an ethical debate over it, related to  
212 patients' privacy. In the other sense, if it focuses upon the room entries and exits it may better preserve  
213 patient privacy but will miss a significant portion of HH opportunities.<sup>12,13,17</sup> The video-camera strategy  
214 didn't solve the problem of time-consumption related to the direct observation method. Beyond that, costs  
215 of implementation may be high, considering the need for multiples cameras split over beds and wards.<sup>38,39</sup>  
216 In conclusion, even if promising, this method has several defaults and constraints that minimize its use in  
217 routine.<sup>24,30,37</sup> Another technology used for assisting HH observation is the use of counters coupled with  
218 ABHR bottles, which can count each time an HH action is taken.<sup>44-58</sup> This is a relatively inexpensive and  
219 simple intervention. Combined with HH training and other measures recommended in multimodal  
220 strategies, bottle counters did enhance the frequency of HH, when accessed by observational and quasi-  
221 experimental studies.<sup>44,49,50,53</sup> However, it may not evaluate HH compliance given that it does not evaluate  
222 HH indications. In our opinion, the most promising electronic tools to assist and enhance HH compliance  
223 are automated HH monitoring networks.<sup>27-29,32-36,59-74</sup> Based on infrared, radiofrequency, ultrasound, real-  
224 time location monitoring, or detectors of alcohol vapors, these systems can detect when an HH  
225 opportunity occur, produce a visible or audible sign to remind the HCW to accomplish HH, and record if  
226 the action was taken or not. Their main advantages, when compared to the direct observation method, are  
227 to continuously monitor HH practices and provide real-time feedback to HCWs, eventually enhancing HH  
228 compliance, and consuming less time of the infection control personnel to monitor compliance.<sup>59-74</sup>  
229 However, they are based on surrogate markers of some of the main 5 HH indications and not the WHO "5

230 Moments” concept itself.<sup>17</sup> Cost of implementation and studies based on quasi-experimental design are  
231 other limitations of these new technologies.<sup>59-74</sup> Available electronic systems intended to evaluate the  
232 quality of the HH action focus on the technique and are based on ultraviolet light (Hand-in-Scan™,  
233 HandInScan Ltd., Hungary)<sup>75</sup> and video measurement technology (SureWash™, Glanta Ltd., Ireland).<sup>76,77</sup>  
234 They have been successfully used for HH training purposes, but they are not intended to continuously  
235 monitor the quality of HH action, which is now thought to be as relevant as the compliance rates.

236 In conclusion, although promising, to date, no automated monitoring system has proved to be able  
237 to monitor and improve HH compliance with all the “5 Moments” as recommended by WHO, nor has  
238 been proven effective in preventing HAI, by the use of the gold standard design, randomized controlled  
239 trials.<sup>24,30,37</sup>

#### 240 **Hand hygiene action quality: volume of ABHR and duration of hand friction**

241 Great efforts have been made to improve hand hygiene compliance among HCWs worldwide. However,  
242 less attention has been devoted to the quality of the hand hygiene action itself, despite this being probably  
243 equally important in preventing HAI. Even though compelling evidence shows that inadequate  
244 performance of the hand hygiene action can lead to cross-transmission of bacteria,<sup>12,78</sup> it still receives little  
245 attention in most healthcare institutions.<sup>79</sup> Contributing factors may include the lack of clear evidence-  
246 based guidance on its performance and the absence of tool to conduct monitoring and foster its  
247 improvement amongst HCWs.

248 The World Health Organization (WHO) hand hygiene guidelines<sup>12</sup> address several aspects related  
249 to the quality of the hand hygiene action. A specific 6-step technique is recommended in the “*how to*  
250 *handrub*” poster. However, less precise information exists on the volume of ABHR (“palmful”) and  
251 duration of hand friction (20 to 30 seconds) required to perform an optimal hand hygiene action. The  
252 Centers for Disease Control and Prevention (CDC)<sup>80</sup> guidelines for hand hygiene are equally imprecise,  
253 mentioning that “*if hands are dry before 10 to 15 seconds, an insufficient amount of ABHR has been*  
254 *used*”. Furthermore, the European norm<sup>81</sup> to test hand products also includes 30 seconds of hand friction,  
255 but ABHRs can be tested with handrubbing durations of up to 60 seconds to pass the norm without a  
256 reference to a volume to be used to pass the norm.<sup>82-84</sup> These heterogeneous and imprecise  
257 recommendations reflect the overall poor level of evidence and lack of consensus.

258 In order to address these controversial issues we have performed several laboratory-based  
259 experimental studies at the HUG Infection Prevention and Control laboratory. These studies focused on  
260 volume of ABHR and duration of hand friction as surrogate markers of hand hygiene action quality.

261 In the experimental study focusing on volume of ABHR,<sup>85</sup> we identified that the volume of ABHR  
262 used by HCWs directly correlates with the log<sub>10</sub> reduction of bacteria in their hands and this is influenced

263 by their hand size. The bacterial  $\log_{10}$  reduction was significantly decreased for each supplemental 0.5ml  
264 of ABHR (0.28  $\log_{10}$ ; 95%CI: 0.23 to 0.34,  $p<0.001$ ) after adjustment on hand size and baseline  $\log_{10}$   
265 count. The  $\log_{10}$  reduction was significantly lower for large hands compared to small hands (-1.19  $\log_{10}$ ;  
266 95%CI: -1.61 to -0.76,  $p<0.001$ ), and significantly lower for medium hands compared to small hands (-  
267 0.57 $\log_{10}$ ; 95%CI: -0.98 to -0.15,  $p=0.007$ ). As a consequence of those differences, HCWs with large  
268 hands achieved a mean reduction of only  $1.42 \log_{10} \pm 1.31$ , after rubbing their hands with 3mL of  
269 ABHR.<sup>85</sup>

270 We also investigated the influence of handrubbing duration in the reduction of bacterial counts on  
271 HCWs hands.<sup>86</sup> We observed that the reduction of bacterial count after handrubbing for 15 or 20 seconds  
272 is not significantly different from that achieved after 30 seconds and demonstrated that performing hand  
273 friction for 15 seconds is non-inferior to 30 seconds, while controlling for possible confounders. Our  
274 results expand and strengthen previous studies' findings.<sup>87,88</sup>

275 These studies suggest the need for customizing the practice of HH taking into consideration the  
276 hand surface area of HCWs, which will indicate the necessary amount of ABHR and the adequate time  
277 devoted to each HH action, in order to achieve proper hand antiseptics and, consequently, patient safety. In  
278 practice however, we know that HCW perform hand hygiene using low volumes of ABHRs and handrub  
279 for short durations. The real duration of handrubbing practiced by HCP in routine care remains largely  
280 unknown, but it is certainly less (mean 11.6 seconds [SD  $\pm 0.7$ ])<sup>88</sup> Additionally, a local evaluation in our  
281 facility (unpublished data) indicates that the average volume of ABHR used per handrubbing action was  
282 around 1.05 mL and the average duration of friction was 10 seconds.

### 283 **Development of device to monitor hand hygiene action quality**

284 In this context, our group, in collaboration with the Schools of Engineering and Art and Design of  
285 Geneva, developed an electronic device that continuously monitors both the amount of ABHR used and  
286 the duration of handrubbing, in each HH action.<sup>89</sup> The device is made of a bracelet to be worn around the  
287 wrist by HCWs and a bottle of ABHR with an added "clip" inside. In addition to continuously monitor the  
288 frequency of use, the volume of ABHR and the duration of hand friction, it is also able to provide  
289 immediate feedback on these two parameters to the individual HCW. We expect this immediate,  
290 automatic and personalized feedback on the volume and duration of hand friction to improve the quality of  
291 the HH action. Importantly, we expect that with the use of this device the HCWs became more aware of  
292 hand hygiene and improve also compliance with the "5 moments".

293 A pilot study (Appendix 1) was conducted in a ward to test the possible effect of real time  
294 feedback on the volume of ABHR used by HCW during patient care. A total of 11 HCW provided care  
295 and rub their hands using an ABHR bottle equipped with the monitoring device first (before period)

296 without feedback and then with feedback during ABHR taking. Overall, the volume of ABHR used  
297 increased from a mean ( $\pm$ SD, median; p25-p75) of 1.33 ml ( $\pm$ 0.37, 1.33; 1.07-1.54) without feedback to a  
298 mean of 3.63 ml ( $\pm$ 0.87, 3.60; 3.04-4.11) after feedback. The average duration of handrubbing monitored  
299 by the device was 13.5 seconds. The mean ( $\pm$ SD, median, maximal negative error, maximal positive error)  
300 of the error is -0.13 sec ( $\pm$ 1.43, 0.00, -3.0, 3.2).

301

## 302 **5. Study rationale**

303 Available methods for monitoring HH practices are too time and resources demanding. Beyond that, even  
304 with the most successful strategies and campaigns, HH compliance reached usually at most 60 to 70%.<sup>20</sup>  
305 Thus, there is still room for further improvement in HH compliance. In this sense, the device intended to  
306 be studied here has at least three potential advantages over traditional strategies to promote HH: it is not  
307 expensive and it is simple to implement; it may provide a continuous sense of “being observed” to HCWs  
308 and therefore influence their behaviour regarding HH<sup>90</sup> and it may improve also the quality of HH action,  
309 since it provides an immediate feedback to HCW. Besides, hand hygiene quality is important and it is  
310 rarely assessed in hand hygiene monitoring. In the last 2 years we have performed a series of  
311 experimental-based studies to address the “optimal” hand hygiene action; we concluded that a  
312 personalized volume of ABHR (according to the hand size) and a 15 seconds duration of hand friction are  
313 needed to an obtain “safe hands”. These parameters will be applied in the current study.

314

## 315 **6. Aims and Hypothesis**

316 We aim to identify the effectiveness of using a new device providing automatic, immediate and personal  
317 feedback regarding the volume of ABHR and duration of hand friction during each hand hygiene gesture  
318 in promoting HH compliance amongst HCWs performing patient-care activities, as well as in enhancing  
319 the quality of HH action.

320 We hypothesize that compliance with HH amongst HCWs may be improved by at least a relative  
321 20%, from baseline to intervention, if they receive a continuous feedback about the quality of their hand  
322 hygiene gesture during daily patient care when using the hand hygiene device.

323

324

325

## 326 7. Study design

327 We will conduct a **stepped wedge, cluster randomized, controlled, open-label** clinical trial at HUG.  
328 The stepped wedge study design was chosen instead of a classic parallel placebo controlled design  
329 because stakeholders considered that the device use was a learning opportunity and thus should be made  
330 available for all study participants. Furthermore, the study team was limited by the availability of devices  
331 and the sequential introduction of those in the wards was appropriate in terms of device production.<sup>91</sup> Data  
332 from the pilot studies show that the device is effective in improving the hand hygiene action quality, as  
333 measured by the volume of ABHR and duration of hand friction (secondary outcomes; Appendix 1) and  
334 no adverse events with its use were registered or are expected.

335 The **cluster randomization** nature of the study imposed itself due to the frequent interactions of  
336 the HCWs in the wards that lead to in-wards behavior cross-contamination.<sup>92</sup> The cluster unit is therefore  
337 the ward. Data will be collected from all clusters at all time-points over time.

338 A stepped wedge trial was designed where clusters (wards) will be randomly and sequentially  
339 rolled out from baseline, to a fixed transitory period of inactive device (no feedback, transition period)  
340 followed by the intervention period (device with feedback; intervention) (Figure 1). The length of the  
341 time-points is one month and the study will have 4 steps. At the beginning of the study none of the wards  
342 will be exposed to the intervention (pre-rollout period) and at the end of the study, all wards will be  
343 exposed to the intervention (post-rollout period). The pre- and post-rollout periods are fixed at one month.  
344 The time of exposure to the active device will be split in 4 steps with a longer period of 4 months in step  
345 1, to a shorter period of exposure of 1 month in step 4 (Figure 1). Thus, the duration of the trial will be 6  
346 months. Additionally, an at distance follow-up period was also designated in order to assess the  
347 sustainability over time of the intervention (secondary outcome).

348 The **primary outcome** will be assessed at the HCW level; repeated measures will be taken from  
349 the same HCWs throughout the study in order to assess the change in HH compliance and its relation to  
350 the intervention (exposure). It will be thus a closed cohort design. All HCWs will contribute to measures  
351 in all time-points of the study (including those in the transition period).

352 This study will be conducted at the Geriatric Hospital, one of the 8 sites of HUG. In 2018, we aim to  
353 perform a larger study to test the device in the acute care hospital sites of HUG.



| Months      | 1 | 2 | 3 | 4 | 5 | 6 | 7 | 8 | 9 |
|-------------|---|---|---|---|---|---|---|---|---|
| Time-points | 1 | 2 | 3 | 4 | 5 | 6 |   |   |   |
| Step 1      |   |   |   |   |   |   |   |   |   |
| Step 2      |   |   |   |   |   |   |   |   |   |
| Step 3      |   |   |   |   |   |   |   |   |   |
| Step 4      |   |   |   |   |   |   |   |   |   |

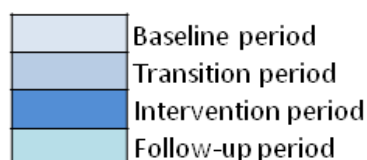

354  
 355 Figure 1: Study design. Stepped-wedge cluster randomized, controlled, open-label clinical trial with 4  
 356 steps. Three clusters (or wards) will be allocated to each step.

- 357
- 358 The study periods (baseline, transition, intervention and follow-up) correspond to:
- 359 - *Baseline period*: this period will last from 1 to 4 months, depending on the step to which the ward is  
 360 allocated. HCWs will perform their normal daily activities and won't have the device. HCWs will be  
 361 directly observed regarding their HH compliance (primary outcome) once per time-point (monthly).
  - 362 - *Transition period*: this period will have a fixed duration of 1 month in all steps. HCWs will perform  
 363 their normal daily activities and will use the device. However, the device won't provide any feedback  
 364 to the HCW using it. HCWs will be observed regarding their hand hygiene compliance (primary  
 365 outcome). Data will be also obtained regarding the volume of ABHR used and duration of hand friction  
 366 continuously by the device (secondary outcome). The device data of this period will be used to adjust  
 367 for the feedback setting of the device in the intervention period. This period is to assess HCW's  
 368 compliance with HH after wearing the device that provides no feedback and will obtain baseline data  
 369 for the secondary outcome hand hygiene quality.
  - 370 - *Intervention period*: this period will last from 1 to 4 months, depending on the step to which the ward  
 371 is allocated. HCWs will continue to use the device introduced during the transition period and the  
 372 device will provide immediate feedback after each hand hygiene action performed by the HCW on the  
 373 volume of ABHR and duration of hand friction. Data will be collected regarding primary and  
 374 secondary outcomes.
  - 375 - *Follow-up period*: this period will have a fixed duration of 1 month in all steps. After the end of the  
 376 intervention period HCWs will stop wearing the device of the study. Three months after they will be  
 377 observed regarding their hand hygiene compliance. This period will help evaluate the sustainability of

378 hand hygiene compliance improvement (secondary outcome) and will not contribute to the primary  
379 outcome analysis.

380

## 381 **8. Sample size**

382 We hypothesized that using the active device will increase the mean compliance with HH by a 20%  
383 relative increase from 69% to 83%, corresponding to a standardized difference in proportions of 0.35.<sup>93</sup>

384 Due to the clustered study design, we will apply a correction for the correlation of compliance within the  
385 same wards by calculating a design effect.<sup>94</sup> We anticipate recruiting at least 5 HCWs per ward, and we  
386 will use an intra-class correlation (ICC) coefficient of 0.015 (based on data from the 2013-2014 survey  
387 about HH compliance in our institution), leading to a design effect of 1.06. Considering a study power of  
388 80%, and an alpha error fixed at 5%, we would need 12 wards and at least 5 HCWs per ward to test our  
389 study hypothesis.<sup>95-98</sup>

390

Table 1: Study power calculations.

|                               | <b>SW-CRT (with 4 steps)</b> |
|-------------------------------|------------------------------|
| Number of time-points/periods | 6 (incl. baseline)           |
| Number of HCW per cluster     | 5                            |
| Number of wards per step      | 3                            |
| Total of wards estimated      | 12                           |
| Total number of measures      | 360                          |
| Study power                   | <b>0.8219</b>                |

391

392 In conclusion, with 12 wards and 5 HCWs per ward, we would be sufficiently powered to  
393 demonstrate the relative increase of 20% compliance.

394 During a session of 20 minutes of HH observation by a HCW, we expect to observe an average of  
395 5 opportunities. This value is based on observations made in 2011 at HUG and at pilots performed in  
396 preparation for this study. Each HCW will be observed at all time-points of the study (6 time-points) and  
397 at follow-up (1 time-point). So, we aim to observe a minimum of 5 HH opportunities for each HCW in  
398 each time-point. This corresponds to a minimum of 30 HH opportunities per HCW during the study  
399 period- not counting with the follow-up. Considering 12 wards to be included, 5 HCWs to be observed  
400 within each unit, for 6 sessions of observations for each HCW, the total number of observation sessions

401 will be therefore at least 360. For the same HCW, we specifically monitor their compliance with each of  
402 the 5 moments for HH.

403

## 404 **9. Data analysis**

405 We will present continuous variables using mean±standard deviation (SD) when normally distributed and  
406 median±interquartile range otherwise. Categorical variables will be presented by number and relative  
407 frequency. Estimation of global HH compliance will be presented with their 95% confidence interval  
408 (95% CI) per arm.

409 All analyses will be done on an intention-to-treat basis. Primary analysis compares the compliance  
410 between the intervention (active device) and the control period by use of logistic regression. Analysis will  
411 use HCW-level data that will be clustered within the ward level. The unit of clustering will be the ward.  
412 We will use the Huber-White sandwich method to calculate robust variance estimates.<sup>99</sup> Time in weeks  
413 will be considered in the model in order to assess its effect on the outcome (treated as categorical and  
414 continuous variable).

415 Because we could not completely control for all confounders in a cluster randomized trial  
416 design<sup>100</sup> we also plan to adjust the model on individual (sex, professional category), ward (sector of care  
417 surgery, rehabilitation or medicine), period of time and fidelity to intervention (device use hours).  
418 Unadjusted between-group differences will be presented for completeness.

419 For the comparison of continuous secondary outcomes (duration of HH action and volume of  
420 ABHR used), mixed linear models will be used with HCW-level data clustered within the ward level.

421 We will perform an as per intention to treat analysis and completed by per protocol analysis.

422

## 423 **10. Randomization and blinding**

424 Three randomization lists will be created by a statistician from the Centre de Recherche Clinique at HUG.  
425 Random block size randomization will be used to have a balanced number of steps in all the trial. The  
426 order of attribution of the steps will be allocated chronologically in sealed envelopes prepared in advance  
427 and kept in a confidential place. Once eligibility criteria are verified, the responsible of the trial will open  
428 the first envelope and attribute the step at the randomization visit. All HCWs from this participating ward  
429 will be enrolled in the randomly attributed step.

430 Allocation concealment will be guaranteed by the use of opaque envelopes sealed up by an  
431 external person who will not participate in the implementation of the study.

432 Blindness will be applied until the beginning of the transition period for HH observers in charge  
433 of assessing the primary outcome, HCWs and head nurse. Due to the nature of the study, it is not feasible  
434 to blind the allocation of the ward after the beginning of the transition period (HCWs will need to use the  
435 device and HH observers will realize if HCWs are wearing a bracelet or not). The statistician in charge of  
436 data analysis will be blinded throughout the trial.

437 The ward ID will be provided at the randomization visit and will be randomly selected (number  
438 from 1 to 12). The HCW ID will also be provided at the randomization visit and will be randomly selected  
439 (from 1 to 120). The same and only ID's will be used in the CRFs; only study investigators will have  
440 access to the codes.

441

## 442 **11. Setting**

443 The study will be conducted at HUG, a tertiary-care university hospital center covering a population of  
444 approximately 800,000 inhabitants. It comprises 1,900 beds split into 50 services and provides acute care  
445 for approximately 47,000 in-patients per year, equivalent to 286,000 annual hospital-days. The average  
446 length of patient stay is 6.4 days. Eight physically independent hospitals constitute this tertiary-care  
447 university hospital center. These hospitals are all located in the city of Geneva and provide different types  
448 of care. All share the same Infection Prevention and Control (IPC) Programme and similar policies  
449 regarding infection control. However, each hospital has different infection control nurses and develops  
450 different infection control promotion activities, including hand hygiene activities, according to their needs  
451 and motivation. These hospitals are:

- 452 - Acute care (Hôpital, bâtiment principal): 23 wards (include Emergency department and Intensive  
453 Care units)
- 454 - Rehabilitation (Hôpital de Beau-Sejour): 8 wards
- 455 - Geriatrics (Hôpital des Trois-Chêne): 12 wards
- 456 - Maternity (Maternité): 4 wards
- 457 - Paediatrics (Hôpital des enfants): 10 wards
- 458 - Psychiatry (Hôpital de psychiatrie): 5 wards
- 459 - Palliative care (Hôpital de Bellerive): 7 wards
- 460 - Long-term care (Hôpital de Loex): 10 wards

461

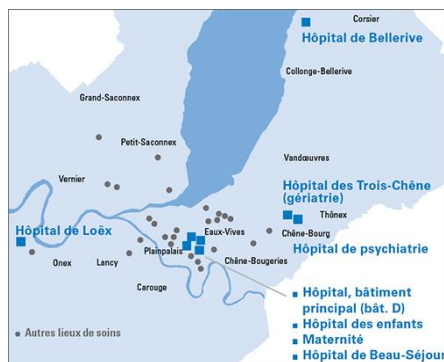

Figure 2: Geographic location of the sectors of the University Hospitals of Geneva (HUG).

## 12. Study activities

The study was presented to the medical, nurse and healthcare assistant’s directors and heads of sectors in December 2016 and their agreement and support was obtained to implement the study in the first semester of 2017.

The study will be conducted at the Geriatric Hospital. All wards will be assessed for eligibility (according to **ward eligibility criteria**) and within wards, HCWs will also be assessed for eligibility (**HCW eligibility criteria**). The eligibility assessment of wards will be performed by the study investigators and assisted by IPC nurses of the HUG. The eligibility criteria of HCWs within eligible wards will be assessed by study investigators with the head nurse and HCWs of each ward at the time of recruitment.

At least 1 month before the study starts a **meeting with the heads** of the wards (nurse and healthcare assistants, physicians, dieticians, physiotherapists) will be held. During this meeting, the detailed study information will be provided.

**Pre-randomization study visits** will be: **ward baseline visits** to eligible wards, **information visits** to recruit HCWs, **HCW screening and baseline visits** to eligible HCWs and finally a **ward randomization visit** will be performed to enrol HCWs and randomize the ward (see schema in Figure 3).

In each ward the study will proceed from baseline, to transition period, intervention and follow-up. The duration of the baseline and intervention periods depend on the step that has been randomized to the ward (Figure 1). Nevertheless, we will observe HCWs’ hand hygiene compliance every month (every time-point).

**Post randomization study visits** will be divided in **ward visits** and **HCWs visits** (Figure 3). In total we will perform a minimum of 16 visits per ward, 8 at the wards level and 8 at the individual HCW

488 level. Ward visits, performed every 4 weeks, are intended to monitor the study implementation and collect  
 489 data at ward level; these visits will be performed preferentially by the investigator not in charge of the  
 490 hand hygiene observations. HCWs visits, also performed every 4 weeks, are intended primarily to perform  
 491 hh observations and will be performed by hand hygiene observers. Below a detailed description of visits

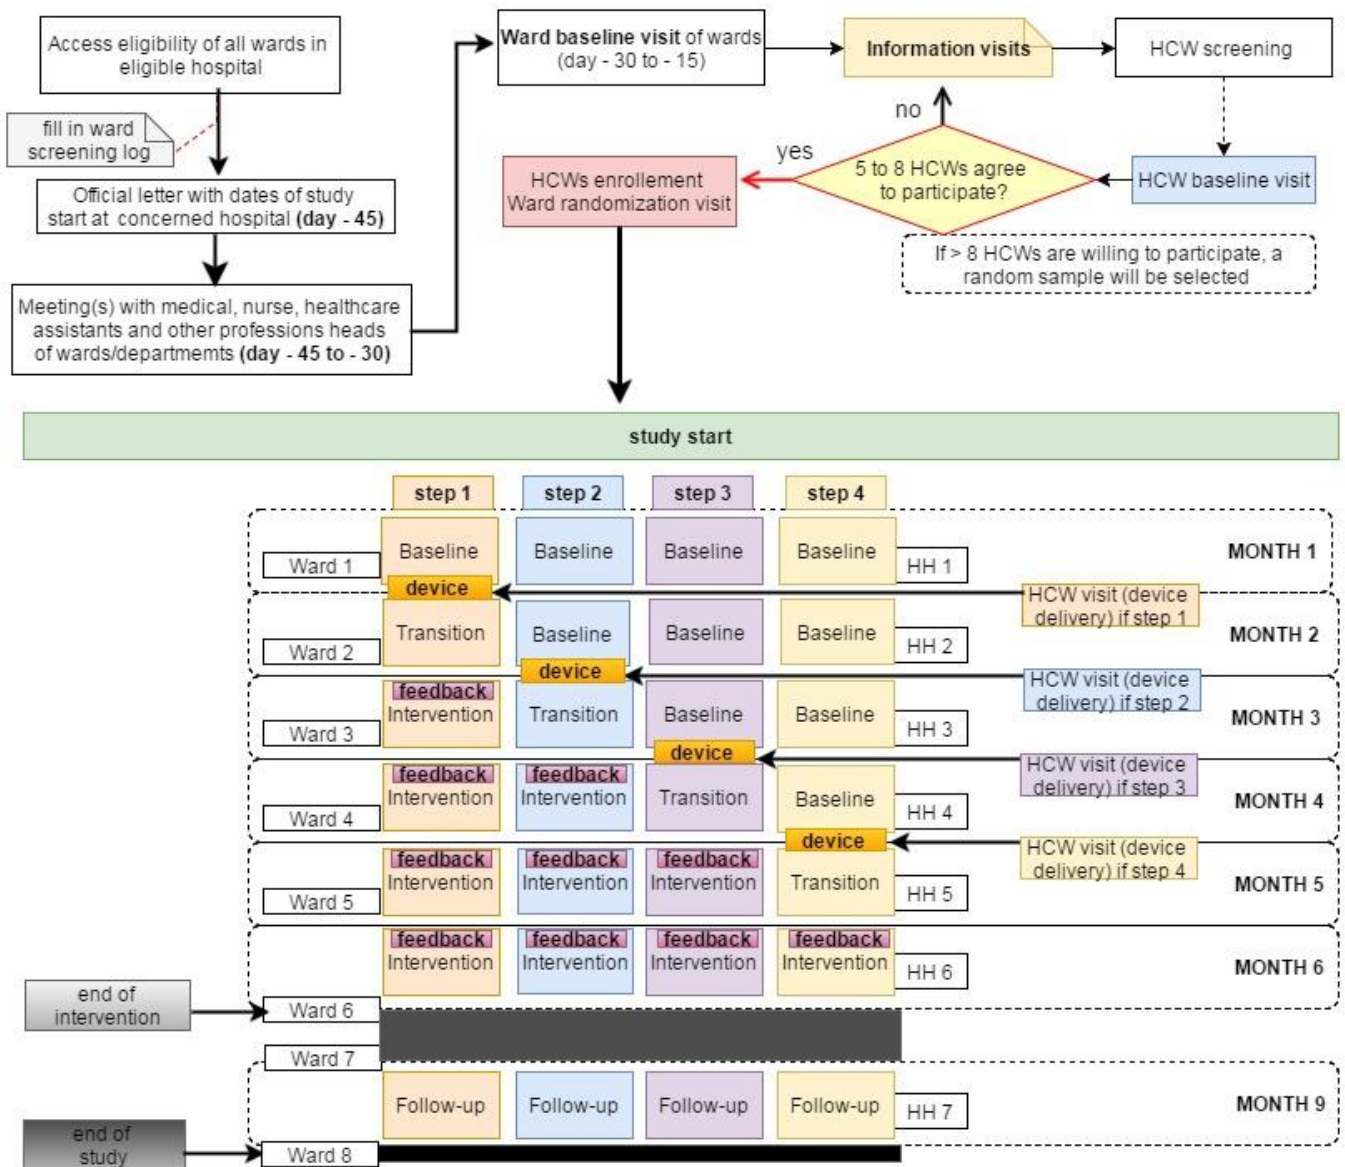

492 at ward and HCW level.

493  
 494 Figure 3: Schema of planned study visits. (device: when the device is delivered to the ward; feedback:  
 495 when the device starts providing feedback to the HCW using it.)

496

497

498 **Ward pre-randomization visits:**

499 1. Ward baseline visit (- 4 weeks of study start): This visit will be made to the eligible wards. It will be  
500 held with the head nurse, and it can also be held with the head of physicians, head of dieticians and  
501 physiotherapists. The objectives of this visit are to explain the study, provide study information leaflets,  
502 confirm ward eligibility, access eligibility of HCWs working in the ward (**fill in HCW screening log**) and  
503 schedule information visits to the wards to recruit HCWs. Data will also be collected to CRF at the ward  
504 level (Table 2).

505  
506 2. Information ward visits (- 4 weeks of study start to – 1 week of study start): These visits are intended to  
507 recruit HCWs for the study. It will be arranged in order to have the maximum HCWs present (possibly at  
508 transmission from the morning shift to the afternoon shift), of several professional categories. We intend  
509 this visit to last around 10 minutes. In this visit we will present the study (by showing the video prepared  
510 for this purpose, and by showing a small power point presentation), answer to questions and distribute  
511 study information leaflets. At the end of the presentation we will have **HCW screening visit** with HCWs  
512 that are interested to participate. If the HCW is eligible, a **HCW baseline visit** will be performed. The  
513 HCW screening log should be updated at the end of each information visit.

514 If with 2 information visits we are not able to recruit enough HCWs we will perform information  
515 visits until the date of study start in order to complete the recruitment. If 5 HCW are not recruited, we will  
516 include the unit with the available number of HCWs. After having at least 5 HCWs that have performed a  
517 baseline visit we will schedule a **ward randomization visit** with the head nurse.

518  
519 3. Ward randomization visit (as from 5 days before the start of the study): During this visit HCWs  
520 inclusion criteria will be confirmed and it will be verified that all Informed Consents are signed. The  
521 randomization envelope will be opened at this time by the investigator not in charge of hand hygiene  
522 observations and its information placed safely (not in the CRF folder or the HCWs folder). The head nurse  
523 (HN), HCWs and HH observers will be blinded to the step the ward is allocated at least until one week  
524 before the start of the transition period in the said ward.

525 During this visit a ward and a HCW ID will be given.

526 The study investigators will define the future ward visit dates together with the HN head nurse and the  
527 HCWs planning (in order to organize the HH visits will be asked).

528

529 **Study start /randomization (day 0)**

530

531 **Ward post-randomization visits:**

532 4. Ward 1 (month 1 visit: week 4 after randomization): In all post-randomization ward visits (1 to 8), ward  
533 data will be collected, general issues related to the study implementation (as verifying that all hh  
534 observations are going as scheduled) will be addressed and working schedules of HCW will be obtained  
535 for the following month (in order to guide the timing of hh observation).

536 If the ward is allocated to step 1, it will be in this visit that the head nurse will be informed of the  
537 allocation of the ward in step 1 (this meaning that the following month his/her unit will pass to the  
538 transition period). In these ward visits (pre-transition period visits), the necessary arrangements will be  
539 made for the introduction of the device in the ward (as setting the location for the placement of the  
540 recharging station, etc). However, the devices and the charging station will only be brought to the ward in  
541 the first weekly day of the start of the transition period. The head nurse will be in charge of informing the  
542 HCWs that the device will be dispoible in that day and will encourage HCWs to start using it. This visit  
543 is presential for step 1 but can be or not for step 2, 3 and 4 (study team can also contact by email or  
544 telephone the head nurse).

545

546 5. Ward 2 (month 2 visit: week 8 after randomization): If ward is allocated to step 2, it will be in this visit  
547 that the head nurse will be informed to the allocation of the ward in step 2 (this meaning that the following  
548 month his/her unit will pass to the transition period). This visit is presential for step 2 but can be or not for  
549 step 1, 3 and 4. If step 1 ward, inform that the ward will progress to the intervention period in the  
550 following month (this meaning that the feedback will be activated to HCWs).

551

552 6. Ward 3 (month 3 visit: week 12 after randomization): If ward is allocated to step 3, it will be in this  
553 visit that the head nurse will be informed to the allocation of the ward in step 3 (this meaning that the  
554 following month his/her unit will pass to the transition period). This visit is presential for step 3 but can be  
555 or not for step 1, 2 and 4. If step 2 ward, inform that the ward will progress to the intervention period in  
556 the following month (this meaning that the feedback will be activated to HCWs).

557

558 7. Ward 4 (month 4 visit: week 16 after randomization): If ward is allocated to step 4, it will be in this  
559 visit that the head nurse will be informed to the allocation of the ward in step 4 (this meaning that the  
560 following month his/her unit will pass to the transition period). This visit is presential for step 4 but can be  
561 or not for step 1, 2 and 3. If step 3 ward, inform that the ward will progress to the intervention period in  
562 the following month (this meaning that the feedback will be activated to HCWs).



563  
564 8. Ward 5 (month 5 visit: week 20 after randomization): If step 4 ward, inform that the ward will progress  
565 to the intervention period in the following month (this meaning that the feedback will be activated to  
566 HCWs).

567  
568 9. Ward 6 (month 6 visit: week 25 after randomization): End of intervention.

569  
570 **Ward follow-up period visits:**

571 10. Ward 7 (+ 9 months after randomization): It should be verified that all HCWs are still working in this  
572 ward; if not state reasons for not working any more in the unit. This is the begin of follow-up.

573 11. Ward 8 (+ 10 months after randomization): End of study.

574

575 **HCW pre-randomization visits:**

576 1.HCWs screening visit: This visit will be the first HCW visit and intends to complete CRF HCW  
577 screening (basic demographics data), assess for study eligibility, give HCW study kit, give informed  
578 consent (long version) and schedule HCW baseline visit.

579 2. HCWs baseline visit: This visit is intended to confirm the intention of HCWs to participate in the study,  
580 to obtain the signed informed consent (mandatory) and to collect baseline data. Additionally, a detailed  
581 description of the study design will be made and a demonstration of how the device works will be  
582 performed.

583

584 **Study start /randomization (day 0)**

585

586 **HCW post-randomization visits:**

587 Investigators in charge of the HH observations will keep a daily updated file of HH observations. The HH  
588 auditors will organize the HH observations in order to obtain a homogenous sample of all the wards in all  
589 weeks of observation. An exception to this rule is if the HCW is on a ward on transition period or the first  
590 month of the intervention period. If this is the case, the HCW will only be observed regarding hand  
591 hygiene compliance from the second week of the respective period. This is intended to account for what  
592 the investigators considered to be a “implementation lag” of the device use (ie., so that the HCW will not  
593 be observed after using the device for one or 2 days).

594 If more than 2 tentatives to observe the HCW do not result in a HH observation session, the head  
595 nurse will be contacted and a specific schedule will be arranged.

596 In order to re-explain briefly the device use, an **extra HCW visit** will be performed with each  
597 HCW on their first working day after the device has been introduced to the ward (this corresponds to the  
598 begin of the transition period).

599 Of note, we don't intend to give personal feedback regarding hand hygiene compliance after each  
600 session of observation. The HH monitoring is only to collect data not perform feedback.

601  
602 3. HCW HH1 (from week 1 to 4 after randomization): HH observation session (at least 5 HH opp for each  
603 HCW).

604  
605 4. HCW HH2 (from week 6 to 8 after randomization): HH observation session (at least 5 HH opp for each  
606 HCW). If the HCW is in a ward allocated to step 1 (meaning that she/he will begin the transition period  
607 this month), a brief extra visit will take place on the first working day of this month to re-explain the use  
608 of the device.

609  
610 5. HCW HH3 (from week 10 to 12 after randomization): HH observation session (at least 5 HH opp for  
611 each HCW). If the HCW is in a ward allocated to step 2 (meaning that she/he will begin the transition  
612 period this month), a brief extra visit will take place on the first working day of this month to re-explain  
613 the use of the device. If the HCW is allocated to step 1, the device will start providing feedback in the  
614 beginning of this month.

615  
616 6. HCW HH4 (from week 14 to 16 after randomization): HH observation session (at least 5 HH opp for  
617 each HCW). If the HCW is in a ward allocated to step 3 (meaning that she/he will begin the transition  
618 period this month), a brief extra visit will take place on the first working day of this month to re-explain  
619 the use of the device. If the HCW is allocated to step 2, the device will start providing feedback in the  
620 beginning of this month.

621  
622 7. HCW HH5 (from week 18 to 20 after randomization): HH observation session (at least 5 HH opp for  
623 each HCW). If the HCW is in a ward allocated to step 4 (meaning that she/he will begin the transition  
624 period this month), a brief extra visit will take place on the first working day of this month to re-explain  
625 the use of the device. If the HCW is allocated to step 3, the device will start providing feedback in the  
626 beginning of this month.

627  
628 8. HCW HH6 (from week 22 to 24 after randomization): HH observation session (at least 5 HH opp for  
629 each HCW). If the HCW is allocated to step 4, the device will start providing feedback in the beginning of  
630 this month.

631  
632 **HCW follow-up period visits:**

633 9. HCW HH7 (from 9 months to 10 months after randomization): HH observation session (at least 5 HH  
634 opp for each HCW).

635  
636  
637  
638  
639  
640  
641  
642  
643  
644  
645  
646  
647  
648  
649  
650  
651  
652  
653  
654  
655  
656  
657  
658  
659

660 **13. Data collection**

661

662 **Ward data collection:**

663 **Ward screening visit** (to be collected on **ward screening log**): date of visit, name of hospital, name of  
 664 ward, screening number of ward, type of ward (ger, rehab, medical, surgical), assess and document  
 665 exclusion criteria and/or reason for no participation (if given), if eligible: number of enrolment and date of  
 666 baseline visit and contacts.

667

668 Table 2: Ward data to be completed in the ward CRFs and the ward dossier font.

|                                                                                                    |                                                                                                                                                                                                                                                                                                                                                                                                                                                                                                                                                                                                                                                                                                                                                                                                                                                                                          |
|----------------------------------------------------------------------------------------------------|------------------------------------------------------------------------------------------------------------------------------------------------------------------------------------------------------------------------------------------------------------------------------------------------------------------------------------------------------------------------------------------------------------------------------------------------------------------------------------------------------------------------------------------------------------------------------------------------------------------------------------------------------------------------------------------------------------------------------------------------------------------------------------------------------------------------------------------------------------------------------------------|
| Table 2: Ward data to be completed in the ward CRF and the ward dossier font. <b>Ward baseline</b> | Date of visit<br>ID of hospital<br>ID ward<br>General ward data:<br>- type of ward: surgical, medical, geriatrics, rehabilitation<br>- number of hospital beds at the study start<br>- bed occupancy in last calendar year<br>- ward HH compliance in last calendar year (if not available, collect at department level)<br>- ward ABHR consumption in last calendar year (ABHR litres dispensed by pharmacy per 1000 patient/days; if not available, collect at department level)<br><br><i>Other (to be completed in the dossier source or other, not CRF):</i><br>- Ward name, hospital name<br>- Confirm ward eligibility<br>- Complete name and contacts of head nurse, head physician, head of dieticians, head of physiotherapists (on screening page)<br>- Fill in HCWs overall screening log<br>- Schedule Information visits to wards<br>- Give ward study brochure / timeline |
| <b>Ward information</b>                                                                            | No data collected to CRF<br><br><i>Other (to be completed in the dossier source or other, not CRF):</i><br>- Collect data on how many HCWs and professional category were present in information visits<br>- Fill in HCWs screening log<br>- Distribute HCWs study brochure and informed consent to HCW willing to participate<br>- Schedule HCWs baseline visit                                                                                                                                                                                                                                                                                                                                                                                                                                                                                                                         |

|                                                      |                                                                                                                                                                                                                                                                                                                                                                                                                                                                                                                                                                                                                                                                                                                                                                                                                                                                                                                                                                                                                                                                                                                             |
|------------------------------------------------------|-----------------------------------------------------------------------------------------------------------------------------------------------------------------------------------------------------------------------------------------------------------------------------------------------------------------------------------------------------------------------------------------------------------------------------------------------------------------------------------------------------------------------------------------------------------------------------------------------------------------------------------------------------------------------------------------------------------------------------------------------------------------------------------------------------------------------------------------------------------------------------------------------------------------------------------------------------------------------------------------------------------------------------------------------------------------------------------------------------------------------------|
| <b>Ward randomization</b>                            | <p>Date of visit</p> <p>ID of hospital</p> <p>ID of ward</p> <ul style="list-style-type: none"> <li>- ID of ward</li> <li>- ID of HCWs enrolled</li> <li>- Date of device use start (it will be coded for data analysis)</li> <li>- Date of feedback start (it will be coded for data analysis)</li> <li>- Date of end of intervention (it will be coded for data analysis)</li> <li>- Date of end of study (it will be coded for data analysis)</li> </ul> <p><i>Other (to be completed in the dossier source, not CRF):</i></p> <ul style="list-style-type: none"> <li>- Confirm absence of HCWs exclusion criteria and perform random sampling of 8 HCW if more are eligible to participate</li> <li>- attribute ward ID and HCW ID</li> <li>- Fill in ward ID doc and HCW ID doc</li> <li>- Open randomization envelop (note on confidential sheet)</li> <li>- Obtain HCWs schedule for study start month (if available)</li> <li>- Schedule ward 1 to 6 visits</li> <li>- Date of device use start</li> <li>- Date of feedback start</li> <li>- Date of end of intervention</li> <li>- Date of end of study</li> </ul> |
| <b>Ward 1 to 6</b><br>(to be recorded in each visit) | <p>Date of visit</p> <p>ID of hospital</p> <p>ID of ward</p> <ul style="list-style-type: none"> <li>- Type of visit (presencial or not – email telephone, none)</li> <li>- ward hand hygiene compliance per month (number of hh opp, number of hh actions, number of HCWs observed, number of hh sessions)</li> <li>- ward ABHR consumption per month (ABHR L dispensed by pharmacy per 1000 patient/days)</li> <li>- number of days (considered as 8h shift) of each individual HCW work according to planning/corrected by head nurse (for adherence measure)</li> <li>- number of patient-days per month (patient-days/month)</li> </ul> <p><i>Other (to be completed in the dossier source, not CRF):</i></p> <p>No data</p>                                                                                                                                                                                                                                                                                                                                                                                            |

|                                |                                                                                                                                                                                                                                        |
|--------------------------------|----------------------------------------------------------------------------------------------------------------------------------------------------------------------------------------------------------------------------------------|
| <b>Ward 7<br/>follow-up</b>    | Date of visit<br>ID of hospital<br>ID of ward<br>- IDs of HCWs randomized still working in the ward<br><br><i>Other (to be completed in the dossier source, not CRF):</i><br>- Reasons for not being able to perform follow-up of HCWs |
| <b>Ward 8<br/>end of study</b> | Date of visit<br>ID of hospital<br>ID of ward                                                                                                                                                                                          |

669  
670  
671  
672  
673  
674  
675  
676  
677  
678  
679  
680  
681  
682  
683  
684  
685

686 **HCW data collection:**

687 **HCW screening visit** (to be collected on **HCW screening log**): name of hospital; name of ward; name of  
 688 HCW; screening number of HCW; date of screening; month and year of birth, gender, profession; assess  
 689 and document exclusion criteria and/or reason for no participation (if given); if absence of exclusion  
 690 criteria and willing to participate (eligible): date of baseline visit.

691

692 Table 3: HCW data to be completed in the HCW CRFs and the HCW dossier font.

|                          |                                                                                                                                                                                                                                                                                                                                                                                                                                                                                                                                                                                                                                                                                                                                                                   |
|--------------------------|-------------------------------------------------------------------------------------------------------------------------------------------------------------------------------------------------------------------------------------------------------------------------------------------------------------------------------------------------------------------------------------------------------------------------------------------------------------------------------------------------------------------------------------------------------------------------------------------------------------------------------------------------------------------------------------------------------------------------------------------------------------------|
| <b>HCW<br/>baseline</b>  | Date of visit<br>ID of hospital<br>ID of ward<br>ID of HCW<br>General HCW data:<br>- (Month) and year when started working in healthcare (excluding the years of formation)<br>- (Month) and year when started of last hand hygiene +- IPC training (at least 1 hour structured training on IPC and hand hygiene) (excluding the years of formation) (at baseline visit dossier source, with HCW)<br>- Working schedule (full-time, part-time, if part time, what % ? )<br>- Hand size (in cm)<br>- Hand size (category: small, medium, large)<br>- ABHR volume personalized<br><br><i>Other (to be completed in the dossier source, not CRF):</i><br>Confirm eligibility<br>Informed consent signed<br>Hopirub rinse, hopirub gel, sterilium<br>Colour of device |
| <b>HCW<br/>inclusion</b> | Date of visit<br>ID of ward<br>ID of HCW<br>If not enrolled state why<br>Randomization number/ID of HCW                                                                                                                                                                                                                                                                                                                                                                                                                                                                                                                                                                                                                                                           |

|                                  |                                                                                                                                                                                                                                                                                                                                                                                                                                                                                                                                                                                                                                                                                                                                                                                                                                                                                                                                                                                                                                                    |
|----------------------------------|----------------------------------------------------------------------------------------------------------------------------------------------------------------------------------------------------------------------------------------------------------------------------------------------------------------------------------------------------------------------------------------------------------------------------------------------------------------------------------------------------------------------------------------------------------------------------------------------------------------------------------------------------------------------------------------------------------------------------------------------------------------------------------------------------------------------------------------------------------------------------------------------------------------------------------------------------------------------------------------------------------------------------------------------------|
| <b>HCW visits 1 to 7</b>         | <p>Date of visit</p> <p>ID of ward</p> <p>ID of HCW</p> <p>Data extracted directly from tablet database (considered CRF):</p> <ul style="list-style-type: none"> <li>- Date (dd/mm/yy) of hand hygiene observation</li> <li>- Time (hh:mm), to be categorized in early morning (from 7h to 8h), morning (between 9 and 12h), early afternoon (from 13h to 14h), afternoon (from 15h to 19h), night (from 20h to 6h)</li> <li>- Indications for HH (5 moments)</li> <li>- Number of hh opportunities observed</li> <li>- Number of hh actions performed</li> <li>- type of hh action (ABHR vs hand washing )</li> <li>- feedback provided to HCWs (yes/no)</li> </ul> <p>To be collected on paper CRF:</p> <ul style="list-style-type: none"> <li>- adverse events (open response, to be asked each time a HCW with the device is observed after a HH session and registered at the dossier source HH) – skin irritation, injury to patient, etc).</li> </ul> <p><i>Other (to be completed in the dossier source, not CRF):</i></p> <p>Comments</p> |
| <b>HCW device delivery visit</b> | <p>Date of visit</p> <p>ID of ward</p> <p>ID of HCW</p> <p>Date of first device utilization (<i>also registered by device automatically</i>)</p> <p>Date of planned device feedback start / state if confirmed (<i>also registered by device automatically</i>)</p> <p>Identification of attributed device bottle</p> <p>Identification of attributed device bracelet</p> <p><i>Other (to be completed in the dossier source, not CRF):</i></p> <p>Comments</p>                                                                                                                                                                                                                                                                                                                                                                                                                                                                                                                                                                                    |



|                                                  |                                                                                                                                                                                                                                                                                                                                                                                                                                                                                                                                                                                                                          |
|--------------------------------------------------|--------------------------------------------------------------------------------------------------------------------------------------------------------------------------------------------------------------------------------------------------------------------------------------------------------------------------------------------------------------------------------------------------------------------------------------------------------------------------------------------------------------------------------------------------------------------------------------------------------------------------|
| <b>Data collected by device<br/>continuously</b> | ID of ward<br>ID of HCW<br>Data collected by the device (device database considered CRF): <ul style="list-style-type: none"> <li>- Code of bottle and bracelet of device</li> <li>- dd/mm/yy and of hh:mm:ss ABHR use</li> <li>- dd/mm/yy and hh:mm:ss of hand friction</li> <li>- volume of ABHR used (ml)</li> <li>- duration of hand friction (sec)</li> <li>- feedback provided on volume (yes/no)</li> <li>- feedback provided on duration (yes/no)</li> <li>- number of device-days of use (considered as approximately 8h shift) (device-days)</li> <li>- number of device-hours of use (device-hours)</li> </ul> |
| <b>HCW<br/>visit 8</b>                           | ID of ward<br>ID of HCW<br>Questionnaire<br><i>Other (to be completed in the dossier source, not CRF):</i><br>Comments                                                                                                                                                                                                                                                                                                                                                                                                                                                                                                   |

693

694

695 **14. Primary and secondary endpoints**

696 The **primary outcome** is the performance of HH action by the HCW observed in the presence of an  
 697 opportunity for hand hygiene during the course of patient care (HH compliance). Hand hygiene  
 698 compliance will be measured at the individual HCW (closed cohort) level at 6 time-points (once a month)  
 699 in the 3 study periods (baseline, transition period and intervention) and at follow-up. For this outcome, we  
 700 will consider a HH opportunity as a binary variable, to be taken as a HH action or not, by the HCW. The  
 701 primary outcome will be defined by the observer who will also define the opportunity (according to  
 702 standard procedures at HUG)<sup>6,11,14</sup> through “on site” direct observation by well-trained IPC professionals  
 703 from SPCI directly on a electronic device (tablet). The method of HH observation was developed by the  
 704 HUG team 20 years ago and has been routinely used since then, both for clinical and research purposes,  
 705 with excellent inter-observer agreement (kappa > 80%).<sup>6,11,14</sup> The method consists of an observation of a  
 706 HCW during a 20 minutes session and the anonymous record of each HH opportunity and its  
 707 correspondent action or the absence of action. Each HH opportunity is classified according to the WHO’s  
 708 5 moments, as previously described.<sup>12</sup> Each month the investigators in charge of HH observations will  
 709 collect at least 5 and 10 opportunities per HCW. Observations will be performed during day working  
 710 hours and during weekdays (night shifts and weekends are excluded). A schedule of visits which takes

711 into account the HCWs working schedule will be compiled and observations will be performed in all  
712 participating wards throughout the month (to ensure a homogenous sample for all wards throughout each  
713 week of the month). Additionally, HCWs carrying the device with/ or without feedback for the first time  
714 will not be observed during the first week of the respective month. This is intended to account for a  
715 “implementation lag” of the device.

716 The **secondary outcomes** were divided in 8 levels:

- 717 - **Hand hygiene quality:** volume of ABHR poured by HCWs and the duration of handrubbing in each  
718 HH action, using the device without feedback (transition period) or device with feedback  
719 (intervention period). This data will be collected automatically and continuously by the device (CRF  
720 device database). Finally, the quality of HH action, assessed by the use of the two previous secondary  
721 outcomes, will be evaluated. HH action will be defined as “of quality” if HH action includes the use  
722 of the minimum personally specified amount of ABHR and if it lasts at least 15 seconds; otherwise it  
723 will be defined as “not adequate”. This outcomes will not be evaluated at baseline and follow-up  
724 since HCWs will not use the device during these periods.
- 725 - **Frequency of hand hygiene action:** data on the frequency of HH action as recorded by the device on  
726 the transition and intervention period. This data will be collected automatically and continuously by  
727 the device (CRF device database). Sub-analysis will be performed according to the period of the day,  
728 type of ward, presence of hand hygiene observers, etc.
- 729 - **Hand hygiene compliance at follow-up:** hand hygiene compliance will be measured 3 months after  
730 the intervention stops to assess for the sustainability of the intervention;
- 731 - **Hand hygiene compliance and alcohol-base handrub consumption at the ward level:** HH  
732 compliance data is recorded at a regular basis by the IPC professionals and ABHR consumption is  
733 provided monthly by the pharmacy (monitored by dividing monthly ward-specific requisition of  
734 alcohol-based handrub by 1000 patient-days; only 100 mL bottles of alcohol-based handrub carried  
735 by health-care workers for their personal use are included in the measure, because this is the  
736 predominant means of hand hygiene among HCWs).
- 737 - **Adherence to use of hand hygiene device:** we will measure how many hours the device will be used  
738 by HCWs (provided directly by the device, recorded as time of device out of the station), adjusted  
739 then for days of use (as working shifts are 8 h, we will consider a 6h use as a day use). Days of device  
740 use will be divided by HCWs working days, and obtain a proportion of device days use by HCW.
- 741 - **Satisfaction and perception of usefulness of the device by HCWs:** a questionnaire and focus  
742 groups discussion will be performed with HCWs participating in the study to evaluate their  
743 experience with the utilization. This will be performed at the end of the intervention.

- 744 - **Hand hygiene quality and HH compliance among HCWs working in several units** during the  
745 study period. This is done as a sub-study with HCWs that are willing to participate but that are  
746 excluded from the main study due to working in several units (meaning that they can't be allocated to  
747 a cluster). This group of HCWs receives the device only in the fifth month of the study, when all the  
748 units have already started the study intervention, to avoid contamination. These HCWs data does not  
749 contribute to the primary outcome analysis.
- 750 - **Adverse events** related to the device are measured using a list of open responses (ie., skin irritation,  
751 injury to patient, etc) asked to participants after each HH session
- 752 - **Bloodstream infections (BSI)** surveillance are measured using the data routinely and prospectively  
753 collected by the IPC program in order to analyse if there is a change in incidence of BSI in the units  
754 during the study period.
- 755

## 756 **15. Study population & Eligibility criteria**

757 Study population: healthcare workers working at the University Hospitals of Geneva (HUG) with patient  
758 care activities.

- 759 - All **units** will be screened to participate in the study.

760 Inclusion criteria: All units are eligible to participate in the study.

761 Exclusion criteria: Units without patient-care activities.

762

- 763 - All **HCWs** in eligible wards can participate in the study.

764 Inclusion criteria: All HCWs working in patient-care activities.

765 Exclusion criteria:

766 1. Work or will work in several different units during the six months after study start

767 2. Who will leave the unit in the six months after study start

768 3. Who have more than three consecutive weeks of vacations in the six months after the study start

769 4. Who don't use the standard ABHR at HUG

770

## 771 **16. Intervention: the electronic device**

772 The intervention consists of wearing an electronic device in the form of a wrist band and a bottle of  
773 ABHR with a "clip" inside that provides a personal, automatic and individualized feedback on hand  
774 hygiene quality surrogate markers to HCWs. This device was developed at HUG in cooperation with the

775 School of Engineers of Geneva. Both components of the device are equipped with electronic sensors that  
 776 continuously record data on the volume of ABHR used (clip in the bottle) and the duration of hand friction  
 777 (wrist band). These components communicate with each other and transmit the information to a computer,  
 778 cell phone or tablet equipped with the designated software.

779 When the feedback option of the device is activated, the device can provide automatic feedback to  
 780 the user regarding the quality of HH action, based on the volume of ABHR used and the duration of each  
 781 HH action. This is a positive feedback and consists in a vibration: the personal bottle of ABHR can  
 782 vibrate when a previously determined volume of ABHR<sup>79</sup> is poured and the bracelet can vibrate each time  
 783 hand friction (handrubbing) lasts for a pre-determined amount of time (15 seconds).<sup>86</sup>

784 The volume of ABHR at which the device (bottle) will be set to provide feedback will be  
 785 determined individually for each participant, based on their own hand surface area.<sup>85</sup> This will be  
 786 calculated according to the formula that has been derived from the laboratory studies on volume of  
 787 ABHR<sup>85</sup> and aiming for a 2 log bacterial reduction in HCWs hands (model without interaction between the  
 788 category of hand size and the volume; Table 4)

789  
 790 Table 4: Calculation of the personalized volume of ABHR to be used in the device (according to hand size  
 791 category)

| Hand size category                                        | Small hands               | Medium hands              | Large hands              |
|-----------------------------------------------------------|---------------------------|---------------------------|--------------------------|
| Mean volume of ABHR for a 2 log reduction (mL)            | 2.2 mL                    | 2.3 mL                    | 3.3 mL                   |
| Mean hand surface (cm <sup>2</sup> )                      | 332.93cm <sup>2</sup>     | 404.20cm <sup>2</sup>     | 473.2 cm <sup>2</sup>    |
| Volume of ABHR per cm <sup>2</sup> (mL/ cm <sup>2</sup> ) | 0.0066 mL/cm <sup>2</sup> | 0.0057 mL/cm <sup>2</sup> | 0.007 mL/cm <sup>2</sup> |

792  
 793 However, if according to this calculation, the volume of ABHR is less than the mean volume that  
 794 is normally used by the HCW (and measured during the transition period) we will use the mean volume  
 795 normally used by the HCW to set the feedback of the device.

796 The duration of hand friction at which the device (bracelet) will be set to give a feedback is 15  
 797 seconds. This was also based on a recent publication from our team.<sup>86</sup> Again, if the mean duration of hand  
 798 friction measured during the transition period is higher than 15 seconds, we will use the mean duration of  
 799 hand friction already done by the HCW to set the feedback of the device.

800 Apart from providing this automatic feedback, the device also records the number of HH actions  
 801 by HCW, the date and time of performing the HH action, the volume of ABHR per HH action and the  
 802 duration of hand friction. Data collection will also include the total amount of time of device use by the  
 803 HCW.

804 Data from the device is recovered by electronic sensors from a portable station that will be placed  
805 in each participating ward. In this station HCWs will position their devices when these are not in use,  
806 Consecutively, the station will transfer the information to a server computer, equipped with an appropriate  
807 homemade software. This data will be available for study investigators at real time on a website. The ID  
808 of HCWs will be coded thus guarantying that the data is anonymous.

809 During the baseline visit HCWs will be shown the device and instructed on how to use it. On the  
810 beginning of the transition phase (where HCWs will be provided with the device), the investigators of the  
811 study (not involved in HH observations) will conduct another HCW visit reminding HCWs on how to use  
812 the device. A telephone line will be continuously made available to assist users for any questions or  
813 difficulties. A 'good practice' leaflet on the device use and a poster with clear instructions on use and  
814 decontamination procedure will be made available near each device station. The device meets the  
815 necessary requirements for use in a healthcare setting since it is smooth, ergonomic, cleanable, and can be  
816 easily disinfected with disinfectants like alcohol or polihexametilbiguanida.

817

## 818 **17. Safety**

819 Data will be collected regarding adverse events related to skin sensibility, patient harm, etc. It will be  
820 recorded as a secondary outcome during each ward visit when observing individual HCWs.

821

## 822 **18. Withdrawal process**

823 HCWs can withdrawal without notice when they want.

824

## 825 **19. Data management**

826 **Source data:** source data are screening log (hospital, ward and HCW), the dossier font (ward and HCW);  
827 hospital ID, ward ID and HCW ID codes. Allocation of steps to wards list.

828 **CRF:** paper CRF (ward and HCW), electronic CRF of hand hygiene observations and electronic CRF of  
829 device data collection.

830 **Document storage and keeping:** Data collected in CRFs will be introduced into a secured excel database.  
831 Data directly collected on the tablet (hand hygiene compliance) and by the electronic device will be stored  
832 in secured servers.

833

## 834 **20. Monitoring**

835 There will be no external monitoring in this study.

836

## 837 **21. Criteria for ending of trial / definition of end of trial**

838 The trial will end after the follow-up period (end of February 2018).

839

## 840 **22. Ethical considerations**

841 The study protocol was submitted to the Regional Research Ethics Committee (CCER), Geneva,  
842 Switzerland, 08/06/2016, ref: (2016-00714). Informed written consent will also be required from each  
843 HCW participating in the study. The study protocol is registered at the ISRCTN25430066, 22/05/2017  
844 (<http://www.isrctn.com/ISRCTN25430066>).

845 Although the use of ABHR may cause minor skin reactions, the same product is currently being used in  
846 all clinical settings at HUG, so the present study poses no additional risk to HCWs. All data collected will  
847 be anonymous and none of the study procedures will interfere with patient care. In addition, the device  
848 complies with current legislation requirements for a medical device used in the hospital setting. Heads of  
849 the concerned departments and wards will be informed of the objectives and interventions planned in the  
850 context of this study.

851

## 852 **23. Timeframe**

853 The protocol will be implemented from May 2017 until February 2018. The data entry will be performed  
854 at the same time. We will perform the data cleaning and analyze the data from February 2018 to April  
855 2018. After that we will present the results on national and international conferences, as well as write a  
856 manuscript for submission.

857

## 858 **24. Limitations**

859 The vast majority of HCWs directly involved in patient care are assigned to work in a single ward.  
860 However, others – mainly physicians, physiotherapists etc.. – perform their activities amongst various  
861 wards. This situation may lead to some form of ‘contamination’, which might decrease the inter-cluster

862 variation and thus affect the study power (however, this is an exclusion criteria so we hope this situation  
863 will be residual). Moreover, the HH opportunities performed by physicians are much lower than HH  
864 accomplished by nurses. Thus, contamination of the clusters due to migration of HCWs is negligible.  
865 Statistical power: planning of cluster-randomised trials requires the estimation of an a priori ICC value in  
866 order to evaluate sample size. The magnitude of this coefficient has a major impact on the power of the  
867 study. Thus, our estimate of ICC has been conservative so to reduce the risk of type II error. However,  
868 previous studies have shown that a priori ICC values are not completely reliable. Thus, the risk of type II  
869 error may be significant despite conservative estimations. The CONSORT statement for cluster-  
870 randomised trials<sup>92</sup> recommends the estimation of an intermediate ICC value during the trial to allow for a  
871 sample size adjustment. This study will comply with the CONSORT recommendation.

872

## 873 **25. Importance and impact**

874 Due to the exponential increase of antimicrobial resistance amongst bacterial pathogens, their transmission  
875 in hospitals predominantly through HCWs hands, and due to the global burden of HAI worldwide, HH is  
876 more important now than ever. In this regard, the quality of HH action is considered to be as relevant as  
877 compliance. The device intended to be studied in the current proposal may improve both compliance and  
878 quality of HH action in a continuous manner, and ultimately contribute to reduce HAI and antimicrobial  
879 resistance spread in all type of health care settings, eventually helping to make hospitals a safer place to  
880 be, as a patient or a HCW.

881

882

883

884

885

886

887

888

889

890

891

892

893

894

895

896

898 **26. References**

899

- 900 1. Allegranzi B, et al. Burden of endemic health-care-associated infection in developing countries:  
901 systematic review and meta-analysis. *Lancet*. 2011 Jan 15;377(9761):228-41.
- 902 2. European Centre for Disease Prevention and Control. Point prevalence survey of healthcare associated  
903 infections and antimicrobial use in European acute care hospitals. Stockholm: ECDC; 2013.  
904 Available at: [http://www.ecdc.europa.eu/en/publications/Publications/healthcare-associated-](http://www.ecdc.europa.eu/en/publications/Publications/healthcare-associated-infections-antimicrobial-use-PPS.pdf)  
905 [infections-antimicrobial-use-PPS.pdf](http://www.ecdc.europa.eu/en/publications/Publications/healthcare-associated-infections-antimicrobial-use-PPS.pdf)
- 906 3. European Centre for Disease Prevention and Control: Annual Epidemiological Report on  
907 Communicable Diseases in Europe 2008. Stockholm, European Centre for Disease Prevention and  
908 Control, 2008. Available at: [http://www.ecdc.europa.eu/en/publications/Publications/](http://www.ecdc.europa.eu/en/publications/Publications/0812_SUR_Annual_Epidemiological_Report_2008.pdf)  
909 [0812\\_SUR\\_Annual\\_Epidemiological\\_Report\\_2008.pdf](http://www.ecdc.europa.eu/en/publications/Publications/0812_SUR_Annual_Epidemiological_Report_2008.pdf)
- 910 4. Office Fédéral de la Santé Publique. [Stratégie nationale de surveillance, de prévention et de lutte contre  
911 les infections HAies (stratégie NOSO): Foire aux questions], 2014.
- 912 5. Pittet D, et al. Evidence-based model for hand transmission during patient care and the role of improved  
913 practices. *Lancet Infect Dis* 2006; 6: 641–652.
- 914 6. Pittet D, et al. Effectiveness of a hospital-wide programme to improve compliance with hand hygiene.  
915 *Lancet*, 2000. 356: 1307-1312.
- 916 7. Pittet D, Compliance with hand disinfection and its impact on hospital-acquired infections. *J Hosp*  
917 *Infect*, 2001. 48 (Suppl A): S40-6.
- 918 8. Ling ML, How KB. Impact of a hospital-wide hand hygiene promotion strategy on healthcare-  
919 associated infections. *Antimicrob Resist Infect Control* 2012;1:13.
- 920 9. Loveday HP, et al. epic3: national evidence-based guidelines for preventing healthcare-associated  
921 infections in NHS hospitals in England. *J Hosp Infect* 2014;86(Suppl 1):S1-70.
- 922 10. Ellingson K, et al. Strategies to prevent healthcare-associated infections through hand hygiene. *Infect*  
923 *Control Hosp Epidemiol* 2014;35:937-60.
- 924 11. Hugonnet S, et al. Alcohol-based handrub improves compliance with hand hygiene in intensive care  
925 units. *Arch Intern Med*. 2002 May 13;162(9):1037-43.
- 926 12. WHO. WHO Guidelines on Hand Hygiene in Health Care, 2009, World Health Organization: Geneva.  
927 Available at: [http://apps.who.int/iris/bitstream/10665/44102/1/9789241597906\\_eng.pdf](http://apps.who.int/iris/bitstream/10665/44102/1/9789241597906_eng.pdf)



- 928 13. WHO. Guide to Implementation: A Guide to the Implementation of the WHO Multimodal Hand  
929 Hygiene Improvement Strategy, 2009. Available at:  
930 [http://whqlibdoc.who.int/hq/2009/WHO\\_IER\\_PSP\\_2009.02\\_eng.pdf](http://whqlibdoc.who.int/hq/2009/WHO_IER_PSP_2009.02_eng.pdf)
- 931 14. Sax H et al. The World Health Organization hand hygiene observation method. *Am J Infect Control*  
932 2009;37:827-834.
- 933 15. Zahar JR. Is hand-rub consumption correlated with hand hygiene and rate of extended-spectrum beta-  
934 lactamase-producing Enterobacteriaceae (ESBL-PE)-acquired infections? *J Hosp Infect.* 2012  
935 Apr;80(4):348-50.
- 936 16. Vernaz N et al. Temporal effects of antibiotic use and hand rub consumption on the incidence of  
937 MRSA and *Clostridium difficile*. *J. Antimicrob. Chemother.* (2008) 62 (3): 601-607.
- 938 17. Sax H et al. 'My five moments for hand hygiene': a user-centred design approach to understand, train,  
939 monitor and report hand hygiene. *J Hosp Infect.* 2007 Sep;67(1):9-21.
- 940 18. Allegranzi B, et al. Status of the implementation of the World Health Organization multimodal hand  
941 hygiene strategy in United States of America health care facilities. *Am J Infect Control.* 2014  
942 Mar;42(3):224-30.
- 943 19. Salmon S, et al. Beginning the journey of hand hygiene compliance monitoring at a 2,100-bed tertiary  
944 hospital in Vietnam. *Am J Infect Control.* 2014 Jan;42(1):71-73.
- 945 20. Allegranzi B, et al. Global implementation of WHO's multimodal strategy for improvement of hand  
946 hygiene: a quasi-experimental study. *Lancet Infect Dis.* 2013 Oct;13(10):843-851.
- 947 21. Barrera L, et al. Effectiveness of a hand hygiene promotion strategy using alcohol-based handrub in 6  
948 intensive care units in Colombia. *Am J Infect Control.* 2011 Oct;39(8):633-9.
- 949 22. Lee A, et al. Hand hygiene practices and adherence determinants in surgical wards across Europe and  
950 Israel: a multicenter observational study. *Am J Infect Control.* 2011 Aug;39(6):517-520.
- 951 23. Mathai E, et al. Promoting hand hygiene in healthcare through national/subnational campaigns. *J Hosp*  
952 *Infect.* 2011 Apr;77(4):294-298.
- 953 24. Stewardson A, et al. Quicker, easier, and cheaper? The promise of automated hand hygiene  
954 monitoring. *Infect Control Hosp Epidemiol.* 2011 Oct;32(10):1029-1031.
- 955 25. Stewardson A, et al. Impact of observation and analysis methodology when reporting hand hygiene  
956 data. *J Hosp Infect.* 2011 Apr;77(4):358-359.
- 957 26. Dhar S, et al. Observer bias in hand hygiene compliance reporting. *Infect Control Hosp Epidemiol*  
958 2010;31(8):869-70.
- 959 27. D'Egidio G, et al. A study of the efficacy of flashing lights to increase the salience of alcohol-gel  
960 dispensers for improving hand hygiene compliance. *Am J Infect Control* 2014;42(8):852-5.

- 961 28. Fakhry M, et al. Effectiveness of an audible reminder on hand hygiene adherence. *Am J Infect Control*  
962 2012;40(4):320-3.
- 963 29. Fisher DA, et al. Automated measures of hand hygiene compliance among HCWs using ultrasound:  
964 validation and a randomized controlled trial. *Infect Control Hosp Epidemiol* 2013;34(9):919-28.
- 965 30. Marra AR, Edmond MB. New technologies to monitor HCW hand hygiene. *Clin Microbiol Infect*  
966 2014;20(1):29-33.
- 967 31. Scheithauer S, et al. Influence of signal colored hand disinfectant dispensers on hand hygiene  
968 compliance at a medical intensive care unit. *Am J Infect Control* 2014;42(8):926-8.
- 969 32. Levchenko AI, et al. Automated monitoring: a potential solution for achieving sustainable  
970 improvement in hand hygiene practices. *Comput Inform Nurs* 2014;32(8):397-403.
- 971 33. Muller MP, et al. Electronic monitoring of individual HCWs' hand hygiene event rate. *Infect Control*  
972 *Hosp Epidemiol* 2014;35(9):1189-92.
- 973 34. Storey SJ, et al. Effect of a contact monitoring system with immediate visual feedback on hand  
974 hygiene compliance. *J Hosp Infect* 2014.
- 975 35. Boudjema S, et al. MediHandTrace (R): a tool for measuring and understanding hand hygiene  
976 adherence. *Clin Microbiol Infect* 2014;20(1):22-8.
- 977 36. Marra AR, et al. The use of real-time feedback via wireless technology to improve hand hygiene  
978 compliance. *Am J Infect Control* 2014;42(6):608-11.
- 979 37. Ward MA, et al. Automated and electronically assisted hand hygiene monitoring systems: a systematic  
980 review. *Am J Infect Control* 2014;42(5):472-8.
- 981 38. Davis CR. Infection-free surgery: how to improve hand-hygiene compliance and eradicate methicillin-  
982 resistant *Staphylococcus aureus* from surgical wards. *Ann R Coll Surg Engl* 2010;92:316-9.
- 983 39. Armellino D, et al. Using high-technology to enforce low-technology safety measures: the use of  
984 third-party remote video auditing and real-time feedback in healthcare. *Clin Infect Dis* 2012;54:1-7.
- 985 40. Armellino D, et al. Replicating changes in hand hygiene in a surgical intensive care unit with remote  
986 video auditing and feedback. *Am J Infect Control* 2013;41:925-927.
- 987 41. Palmore TN, Henderson DK. Big brother is washing. Video surveillance for hand hygiene adherence,  
988 through the lenses of efficacy and privacy. *Clin Infect Dis* 2012;54:8-9.
- 989 42. Boyce JM. Electronic Monitoring in Combination with Direct Observation as a Means to Improve  
990 Hand Hygiene Compliance. *American Journal of Infection Control* (in press).
- 991 43. Pires D., Pittet D. Hand hygiene electronic monitoring: are we there yet? *American Journal of*  
992 *Infection Control* (in press).

- 993 44. Larson EL, et al. An organizational climate intervention associated with increased handwashing and  
994 decreased nosocomial infections. *Behav Med* 2000;26:14-22.
- 995 45. Larson EL, et al. Hand hygiene behavior in a pediatric emergency department and a pediatric intensive  
996 care unit: comparison of use of 2 dispenser systems. *Am J Crit Care* 2005;14:304-11.
- 997 46. Kinsella G, et al. Electronic surveillance of wall-mounted soap and alcohol gel dispensers in an  
998 intensive care unit. *J Hosp Infect* 2007; 66:34-9.
- 999 47. Whitby M, et al. Three successful interventions in health care workers that improve compliance with  
1000 hand hygiene: is sustained replication possible? *Am J Infect Control* 2008;36:349-55.
- 1001 48. Boyce JM, et al. Evaluation of an electronic device for real-time measurement of alcohol-based hand  
1002 rub use. *Infect Control Hosp Epidemiol* 2009;30:1090-5.
- 1003 49. Koff MD, et al. Reduction in ventilator associated pneumonia in a mixed intensive care unit after  
1004 initiation of a novel hand hygiene program. *J Crit Care* 2011;26:489-95.
- 1005 50. Koff MD, et al. Reduction in intraoperative bacterial contamination of peripheral intravenous tubing  
1006 through the use of a novel device. *Anesthesiology* 2009;110:978-85.
- 1007 51. Marra AR, et al. Controlled trial measuring the effect of a feedback intervention on hand hygiene  
1008 compliance in a step-down unit. *Infect Control Hosp Epidemiol* 2008;29:730-5.
- 1009 52. Marra AR, et al. Positive deviance: a new strategy for improving hand hygiene compliance. *Infect*  
1010 *Control Hosp Epidemiol* 2010;31:12-20.
- 1011 53. Marra AR, et al. Measuring rates of hand hygiene adherence in the intensive care setting: a  
1012 comparative study of direct observation, product usage, and electronic counting devices. *Infect*  
1013 *Control Hosp Epidemiol* 2010;31:796-801.
- 1014 54. Marra AR, et al. Positive deviance: a program for sustained improvement in hand hygiene compliance.  
1015 *Am J Infect Control* 2011;39:1-5.
- 1016 55. Macedo RC, et al. Positive deviance: using a nurse call system to evaluate hand hygiene practices. *Am*  
1017 *J Infect Control* 2012;40:946-50.
- 1018 56. Helder OK, et al. Computer screen saver hand hygiene information curbs a negative trend in hand  
1019 hygiene behavior. *Am J Infect Control* 2012;40:951-4.
- 1020 57. Helder OK, et al. Hand disinfection in a neonatal intensive care unit: continuous electronic monitoring  
1021 over a oneyear period. *BMC Infect Dis* 2012;12:248.
- 1022 58. Morgan DJ, et al. Automated hand hygiene count devices may better measure compliance than human  
1023 observation. *Am J Infect Control* 2012;40:955-9.
- 1024 59. Boscart VM, et al. Advanced technologies to curb healthcare-associated infections. *Healthc Pap*  
1025 2009;9:51-5.

- 1026 60. Swoboda SM, et al. Electronic monitoring and voice prompts improve hand hygiene and decrease  
1027 nosocomial infections in an intermediate care unit. *Crit Care Med* 2004;32:358-63.
- 1028 61. Swoboda SM, et al. Isolation status and voice prompts improve hand hygiene. *Am J Infect Control*  
1029 2007;35:470-6.
- 1030 62. Venkatesh AK, et al. Use of electronic alerts to enhance hand hygiene compliance and decrease  
1031 transmission of vancomycin-resistant *Enterococcus* in a hematology unit. *Am J Infect Control*  
1032 2008;36:199-205.
- 1033 63. Sahud AG, et al. Measuring hand hygiene compliance: a new frontier for improving hand hygiene.  
1034 *Infect Control Hosp Epidemiol* 2009;30:1132.
- 1035 64. Sahud AG, et al. An electronic hand hygiene surveillance device: a pilot study exploring surrogate  
1036 markers for hand hygiene compliance. *Infect Control Hosp Epidemiol* 2010;31:634-9.
- 1037 65. Sahud AG, et al. Feasibility and effectiveness of an electronic hand hygiene feedback device targeted  
1038 to improve rates of hand hygiene. *J Hosp Infect* 2012;82:271-3.
- 1039 66. Boscart VM, et al. Acceptability of a wearable hand hygiene device with monitoring capabilities. *J*  
1040 *Hosp Infect* 2008;70:216-22.
- 1041 67. Levchenko AI, et al. The feasibility of an automated monitoring system to improve nurses' hand  
1042 hygiene. *Int J Med Inform* 2011; 80:596-603.
- 1043 68. Cheng VC, et al. Introduction of an electronic monitoring system for monitoring compliance with  
1044 Moments 1 and 4 of the WHO "My 5 Moments for Hand Hygiene" methodology. *BMC Infect Dis*  
1045 2011;11:151.
- 1046 69. Polgreen PM, et al. Method for automated monitoring of hand hygiene adherence without radio-  
1047 frequency identification. *Infect Control Hosp Epidemiol* 2010;31:1294-7.
- 1048 70. Fries J, et al. Monitoring hand hygiene via human observers: how should we be sampling? *Infect*  
1049 *Control Hosp Epidemiol* 2012;33:689-95.
- 1050 71. Hornbeck T, et al. Using sensor networks to study the effect of peripatetic HCWs on the spread of  
1051 hospital-associated infections. *J Infect Dis* 2012;206:1549-57.
- 1052 72. Sharma D, et al. The precision of human-generated hand-hygiene observations: a comparison of  
1053 human observation with an automated monitoring system. *Infect Control Hosp Epidemiol*  
1054 2012;33:1259-61.
- 1055 73. Edmond MB, et al. Successful use of alcohol sensor technology to monitor and report hand hygiene  
1056 compliance. *J Hosp Infect* 2010;76:364-5.
- 1057 74. Joch A. Badge brings automated edge to infection control. Interview by Alan Joch. *Mater Manag*  
1058 *Health Care* 2009;18:15-17.

- 1059 75. Szilágyi L, et al. A large-scale assessment of hand hygiene quality and the effectiveness of the  
1060 “WHO 6-steps”. *BMC Infectious Diseases* 2013, 13:249.
- 1061 76. Stewardson A, et al. Efficacy of a New Educational Tool to Improve Handrubbing Technique amongst  
1062 HCWs: A Controlled, Before-After Study. *PLoS ONE* 2014 9(9): e105866.
- 1063 77. Higgins A, et al. Improved hand hygiene technique and compliance in HCWs using gaming  
1064 technology. *Journal of Hospital Infection*, 84 (2013) 32-37.
- 1065 78. Laustsen S, Lund E, Bibby BM, Kristensen B, Thulstrup AM, Miller JK. Effect of correctly using  
1066 alcohol-based hand rub in a clinical setting. *Infect Control* 2008;**29**(10):954–6.
- 1067 79. Pittet D. Hand hygiene: it’s all about when and how. *Infect Control Hosp Epidemiol* 2008;**29**(10):957–  
1068 9. Doi: 10.1086/592218.
- 1069 80. Boyce JM, Pittet D. Guideline for hand hygiene in health-care settings: recommendations of the  
1070 Healthcare Infection Control Practices Advisory Committee and the HICPAC/SHEA/APIC/IDSA  
1071 Hand Hygiene Task Force. *Am J Infect Control* 2002;**30**(8):S1–46.
- 1072 81. European Committee for Standardization. European Norm 1500: chemical disinfectants and  
1073 antiseptics. Hygienic handrub. Test method and requirements (phase 2/step 2). Version 2013.
- 1074 82. Macinga DR, Shumaker DJ, Werner H-P, et al. The relative influences of product volume, delivery  
1075 format and alcohol concentration on dry-time and efficacy of alcohol-based hand rubs. *BMC Infect*  
1076 *Dis* 2014;**14**(1):1.
- 1077 83. Gayet-Ageron A, Bellissimo-Rodrigues F, Soule H, Martin Y, Pittet D. Relationship between hand  
1078 size, volume of alcohol-based handrub and time needed to dry hands. An experimental laboratory-  
1079 based study. *Antimicrob Resist Infect Control* 2015;**4**(Suppl 1):P303. Doi: 10.1186/2047-2994-4-S1-  
1080 P303.
- 1081 84. Kampf G, Marschall S, Eggerstedt S, Ostermeyer C. Efficacy of ethanol-based hand foams using  
1082 clinically relevant amounts: a cross-over controlled study among healthy volunteers. *BMC Infect Dis*  
1083 2010;**10**(1):1.
- 1084 85. Bellissimo-Rodrigues F, et al. Should alcohol-based hand rub use be customized according to HCWs  
1085 hand size? Submitted to the International Conference on Prevention and Infection Control (ICPIC  
1086 2015) on Mars 20, 2015. ICPIC15-ABS-1257.
- 1087 86. Pires D., Soule H., Bellissimo-Rodrigues F., Gayet-Ageron A., Pittet D. Hand hygiene with alcohol-  
1088 based handrub: how long is long enough? *Infect Control Hosp Epidemiol* (in press)
- 1089 87. Dharan S., Hugonnet S., Sax H., Pittet D. Comparison of Waterless Hand Antisepsis Agents at Short  
1090 Application Times: Raising the Flag of Concern •. *Infect Control Hosp Epidemiol* 2003;**24**(3):160–4.  
1091 Doi: 10.1086/502182.

- 1092 88. Sickbert-Bennett EE., Weber DJ., Gergen-Teague MF., Sobsey MD., Samsa GP., Rutala WA.  
1093 Comparative efficacy of hand hygiene agents in the reduction of bacteria and viruses. *Am J Infect*  
1094 *Control* 2005;**33**(2):67–77. Doi: 10.1016/j.ajic.2004.08.005.
- 1095 89. Vesin JM et al. Recognition of hand gestures through accelerometer signals. Application to patient  
1096 safety (2006-2009), Swiss national fund for scientific research.
- 1097 90. Pittet D, et al. Hand hygiene among physicians: performance, beliefs, and perceptions. *Ann Intern*  
1098 *Med*, 2004. 141(1): 1-8.
- 1099 91. Hemming K, Haines TP, Chilton PJ, Girling AJ, Lilford RJ. The stepped wedge cluster randomised  
1100 trial: rationale, design, analysis, and reporting. *BMJ* 2015;351:h39 doi: 10.1136/bmj.h391162.
- 1101 92. Campbell MK, et al. Consort 2010 statement: extension to cluster randomised trials. *BMJ*  
1102 2012;345:e5661.
- 1103 93. Allegranzi B, et al. Successful implementation of the World Health Organization hand hygiene  
1104 improvement strategy in a referral hospital in Mali, Africa. *Infect Control Hosp Epidemiol*. 2010  
1105 Feb;31(2):133-41.
- 1106 94. WHO. Hand Hygiene Technical Reference Manual. 2009. Available at:  
1107 [http://whqlibdoc.who.int/publications/2009/9789241598606\\_eng.pdf](http://whqlibdoc.who.int/publications/2009/9789241598606_eng.pdf).
- 1108 95. Woertman W, de HE, Moerbeek M, Zuidema SU, Gerritsen DL, Teerenstra S. Stepped edge designs  
1109 could reduce the required sample size in cluster randomized trials. *J Clin Epidemiol* 2013;66:752e8.
- 1110 96. Hemming K, Girling A. A menu driven facility for sample size for power and detectable difference  
1111 calculations in stepped wedge randomised trials. *Stata J* 2014;14:363e80.
- 1112 97. Baio G, Copas A, Ambler G, Hargreaves J, Beard E, Omar RZ. Sample size calculation for a stepped  
1113 wedge trial. *Trials* 2015;16:354-368
- 1114 98. Hemming K, Taljaard M. Sample size calculations for stepped wedge and cluster randomised trials: a  
1115 unified approach. *J Clin Epidemiol* 2016;69:137-146.
- 1116
- 1117 99. White H. A heteroskedasticity-consistent covariance matrix estimator and a direct test for  
1118 heteroskedasticity. *Econometrica* 1980; 48: 817–38; Williams RL. A note on robust variance  
1119 estimation for cluster-correlated data. *Biometrics* 2000; 56: 645–46.).
- 1120 100. European Medicines Agency (2015). Guideline on adjustment for baseline covariates in clinical trials.  
1121 [www.ema.europa.eu/docs/en\\_GB/document\\_library/Scientific\\_guideline/2015/03/WC500184923.pdf](http://www.ema.europa.eu/docs/en_GB/document_library/Scientific_guideline/2015/03/WC500184923.pdf)  
1122 Accessed on 7 Mar 2017.

1123  
1124

## 27. Appendice 1

Corrections applied to the clip to increase its precision and monitoring of the volume of ABHR used in a pilot study.

### 1) Corrections applied to the device:

Precision of the measures obtained in real time during patient care to hand disinfectant bottle :

The error distribution can be approximated by the following distribution (Figure 1) with parameters :

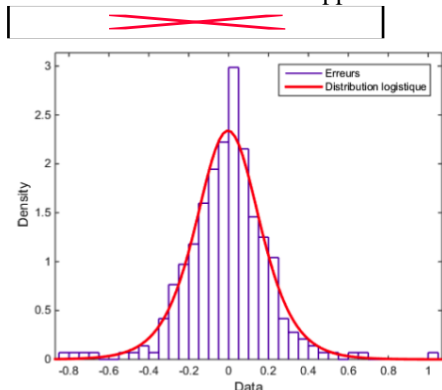

**Note :** 98% of the measures are in the error range [-0.5; 0.5] ml and 88% are in the range [-0.3; 0.3] ml.

### 2) Results from a pilot study monitoring the volume of ABHR used among HCW during patient care with vs. without device-provided feedback on volume use.

11 participants were included in the pilot to test in real life, during patient care, the effect of feedback to the individual HCW the volume of ABHR used. There were 4 periods without feedback and 4 periods with feedback provided. All 11 participants were included at the same time.

In the period without feedback (before feedback was given to the HCW) :

- 9 participants provided some data regarding the volume of ABHR used at time 1 (T1)
- 10 participants provided some data regarding the volume of ABHR used at T2
- 10 participants provided some data regarding the volume of ABHR used at T3
- 10 participants provided some data regarding the volume of ABHR used at T4

In the period with feedback provided:

- 9 participants provided some data regarding the volume of ABHR used at T1
- 9 participants provided some data regarding the volume of ABHR used at T2
- 7 participants provided some data regarding the volume of ABHR used at T3
- 8 participants provided some data regarding the volume of ABHR used at T4

The results are presented in the following Table.

In brief, the volume of ABHR used increased from a mean ( $\pm$ SD, median; p25-p75) of 1.33 ml ( $\pm$ 0.37, 1.33; 1.07-1.54) without feedback to a mean of 3.63 ml ( $\pm$ 0.87, 3.60; 3.04-4.11) after feedback.

1164 Description of the duration, volume and number of disinfections used by the participants at each time-period

| Description of the mean<br>(±SD, median; p25-p75) | T1                            | T2                            | T3                            |
|---------------------------------------------------|-------------------------------|-------------------------------|-------------------------------|
| Before (wo feedback)                              |                               |                               |                               |
| Time of observation (min.)                        | 176.7 (±10; 180: 180-180)     | 324.0 (±110.3; 360: 300-420)  | 348.0 (±37.9; 360: 300-360)   |
| Number of disinfection                            | 14.3 (±7.5; 13: 8-18)         | 16.8 (±8.9; 18.5: 11-23)      | 20.1 (±9.0; 20.5: 12-27)      |
| Volume of ABHR used                               | 20.2 (±10.7; 20.9: 12.3-23.1) | 22.2 (±13.5; 25.9: 7.5-32.3)  | 27.6 (±15.1; 28.7: 13-38.5)   |
| Volume per action                                 | 1.40 (±0.40; 1.36: 1.28-1.61) | 1.29 (±0.42; 1.26: 1.06-1.57) | 1.33 (±0.39; 1.32: 1.08-1.54) |
| After (with feedback)                             |                               |                               |                               |
| Time of observation (min.)                        | 286.7 (±40.0; 300: 300-300)   | 420 (±0; 420: 420-420)        | 360 (±0; 360: 360-360)        |
| Number of disinfection                            | 13.7 (±6.0; 15: 10-16)        | 18.6 (±5.1; 20: 19-22)        | 16.6 (±6.2; 18: 14-22)        |
| Volume of ABHR used                               | 53.8 (±21.6; 55.4: 43.9-62.6) | 68.9 (±29.2; 63.4: 60-95.4)   | 50.0 (±19.1; 54.6: 26-62.3)   |
| Volume per action                                 | 4.06 (±0.56; 3.96: 3.86-4.39) | 3.73 (±1.21; 3.42: 3.34-4.63) | 3.25 (±1.18; 3.19: 2.48-4.33) |
| P-values comparing after to before                |                               |                               |                               |
| Time of observation                               | 0.0174                        | 0.0174                        | 0.157                         |
| Number of disinfections                           | 0.99                          | 0.953                         | 0.0277                        |
| Volume of ABHR used                               | 0.0280                        | 0.0077                        | 0.0277                        |
| Volume per action                                 | 0.018                         | 0.0077                        | 0.0277                        |

1165

| Description of the mean (±SD, median; p25-p75) | T4                            | Overall                              |
|------------------------------------------------|-------------------------------|--------------------------------------|
| Before (wo feedback)                           |                               |                                      |
| Time of observation (min.)                     | 294.0 (±86.9; 240: 240-420)   | 1022.7 (±277.1; 1080: 780-1140)      |
| Number of disinfection                         | 9.2 (±6.6; 8.5: 5-10)         | 53.6 (±17.2; 56: 40-65)              |
| Volume of ABHR used                            | 12.9 (±9.4; 13: 3.4-15.6)     | 73.5 (±35.2; 60.3: 51.8-98.8)        |
| Volume per action                              | 1.32 (±0.38; 1.36: 1.13-1.52) | <b>1.33 (±0.37; 1.33: 1.07-1.54)</b> |
| After (with feedback)                          |                               |                                      |
| Time of observation (sec.)                     | 90.0 (±55.5; 60: 60-120)      | 872.7 (±284.4; 780: 660-1140)        |
| Number of disinfection                         | 6.9 (±4.7; 5: 4-8.5)          | 41.9 (±19.5; 41: 29-53)              |
| Volume of ABHR used                            | 26.8 (±17.6; 21.5: 15.6-32.7) | 151.8 (±71.1; 164.4: 77.8-214.0)     |
| Volume per action                              | 4.02 (±0.95; 3.73: 3.31-4.52) | <b>3.63 (±0.87; 3.60: 3.04-4.11)</b> |
| P-values comparing after to before             |                               |                                      |
| Time of observation                            | 0.0105                        | 0.196                                |
| Number of disinfections                        | 0.399                         | 0.0552                               |
| Volume of ABHR used                            | 0.0687                        | 0.0033                               |
| Volume per action                              | 0.0117                        | <b>0.033</b>                         |

1166

1167 Note: The average duration of handrubbing monitored by the device was 13.5 sec in 7 HCW who performed  
 1168 a total of 64 actions. The comparison between the time measured by the device and a chronometer evaluated the  
 1169 quality of the time measurement by the device. The chronometer measure had an accuracy of ±1 sec. The mean  
 1170 (±SD, median, maximal negative error, maximal positive error) of the error was -0.13 sec (±1.43, 0.00, -3.0, 3.2
