# Supplementary material for: Effect of Wearing a Novel Electronic Wearable Device on Hand Hygiene Compliance Among Health Care Workers: A Stepped-Wedge Cluster Randomized Clinical Trial
Source: PubMed Central journal article supplement (PMC7871189; doi:10.1001/jamanetworkopen.2020.35331), 2021-02-08
Supplement: jamanetwopen-e2035331-s003.pdf [file jamanetwopen-e2035331-s003.pdf]

## Data Sharing Statement

Pires. Effect of Wearing a Novel Electronic Wearable Device on Hand Hygiene Compliance Among Health Care Workers. *JAMA Netw Open*. Published February 08, 2021.

doi:10.1001/jamanetworkopen.2020.35331

### Data

**Data available:** No

### Additional Information

**Explanation for why data not available:** We can make the data available upon request.
